# Supplementary material
Source: ML conference proceedings conference paper supplement (https://proceedings.mlr.press/v119/jacot20a.html)
Supplement: Supplementary file 1 [file jacot20a-supp.pdf]

---

# Supplementary Material for Implicit Regularization of Random Feature Models

---

We organize the Supplementary Material (Supp. Mat.) as follows:

- In Section A, we present the details for the numerical results presented in the main text (and in the Supp. Mat.).
- In Section B, we present additional experiments and some discussions.
- In Section C, we present the proofs of the mathematical results presented in the main text.

## A. Experimental Details

The experimental setting consists of  $N$  training and  $N_{\text{tst}}$  test datapoints  $\{(x_i, y_i)\}_{i=1}^{N+N_{\text{tst}}} \in \mathbb{R}^d \times \mathbb{R}$ . We sample  $P$  Gaussian features  $f^{(1)}, \dots, f^{(P)}$  of  $N + N_{\text{tst}}$  dimension with zero mean and covariance matrix entries thereof  $C_{i,j} = K(x_i, x_j)$  where  $K(x, x') = \exp(-\|x - x'\|^2/\ell)$  is a Radial Basis Function (RBF) Kernel with lengthscale  $\ell$ . The extended data matrix  $\bar{F} = \frac{1}{\sqrt{P}}[f^{(1)}, \dots, f^{(P)}]$  of size  $(N + N_{\text{tst}}) \times P$  is decomposed into two matrices: the (training) data matrix  $F = \bar{F}_{[1:N,:]}$  of size  $N \times P$ , and a test data matrix  $F_{\text{tst}} = \bar{F}_{[N+1:N+N_{\text{tst}},:]}$  of size  $N_{\text{tst}} \times P$  so that  $\bar{F} = [F; F_{\text{tst}}]$ . For a given ridge  $\lambda$ , we compute the optimal solution using the data matrix  $F$ , i.e.  $\hat{\theta} = F^T (FF^T + \lambda I_N)^{-1} y$  and obtain the predictions on the test datapoints  $\hat{y}_{\text{tst}} = F_{\text{tst}} F^T (FF^T + \lambda I_N)^{-1} y$ .

Using the procedure above, we performed the following experiments:

### A.1. Experiments with Sinusoidal data

We consider a dataset of  $N = 4$  training datapoints  $(x_i, \sin(x_i)) \in [0, 2\pi) \times [-1, 1]$  and  $N_{\text{tst}} = 100$  equally spaced test data points in the interval  $[0, 2\pi)$ . In this experiment, the lengthscale of the RBF Kernel is  $\ell = 2$ . We compute the average and standard deviation the  $\lambda$ -RF predictor using 500 samplings of  $\bar{F}$  (see Figure 1 in the main text and Figure 1 in the Supp. Mat.).

### A.2. MNIST experiments

We sample  $N = 100$  and  $N_{\text{tst}} = 100$  images of digits 7 and 9 from the MNIST dataset (image size  $d = 24 \times 24$ , edge pixels cropped, all pixels rescaled down to  $[0, 1]$  and recentered around the mean value) and label each of them with  $+1$  and  $-1$  labels, respectively. In this experiment, the lengthscale of the RBF Kernel is  $\ell = d\ell_0$  where  $\ell_0 = 0.2$ . We approximate the expected  $\lambda$ -RF predictor on the test datapoints using the average of  $\hat{y}_{\text{tst}}$  over 50 instances of  $\bar{F}$  and compute the MSE (see Figures 2, 3 in the main text; in the ridgeless case  $-\lambda = 10^{-4}$  in our experiments– when  $P$  is close to  $N$ , the average is over 500 instances). In Figure 4 of the main text, using  $N_{\text{tst}} = 100$  test points, we compare two predictors trained over  $N = 100$  and  $N = 1000$  training datapoints.

### A.3. Random Fourier Features

We sample random Fourier Features corresponding to the RBF Kernel with lengthscale  $\ell = d\ell_0$  where  $\ell_0 = 0.2$  (same as above) and consider the same dataset as in the MNIST experiment. The extended data matrix  $\bar{F}$  for Fourier features is obtained as follows: we sample  $d$ -dimensional i.i.d. centered Gaussians  $w^{(1)}, \dots, w^{(P)}$  with standard deviation  $\sqrt{2/\ell}$ , sample  $b^{(1)}, \dots, b^{(P)}$  uniformly in  $[0, 2\pi)$ , and define  $\bar{F}_{i,j} = \sqrt{\frac{2}{P}} \cos(x_i^T w^{(j)} + b^{(j)})$ . We approximate the expected Fourier Features predictor on the test datapoints using the average of  $\hat{y}_{\text{tst}}$  over 50 instances of  $\bar{F}$  (see Figure 5).

## B. Additional Experiments

We present the following complementary simulations:

- In Section B.1, we present the distribution of the  $\lambda$ -RF predictor for the selected  $P$  and  $\lambda$ .
- In Section B.2, we present the evolution of  $\tilde{\lambda}$  and its derivative  $\partial_\lambda \tilde{\lambda}$  for different eigenvalue spectra.
- In Section B.3, we show the evolution of the eigenvalue spectrum of  $\mathbb{E}[A_\lambda]$ .
- In Section B.4, we present numerical experiments on MNIST using random Fourier features.

### B.1. Distribution of the RF predictor

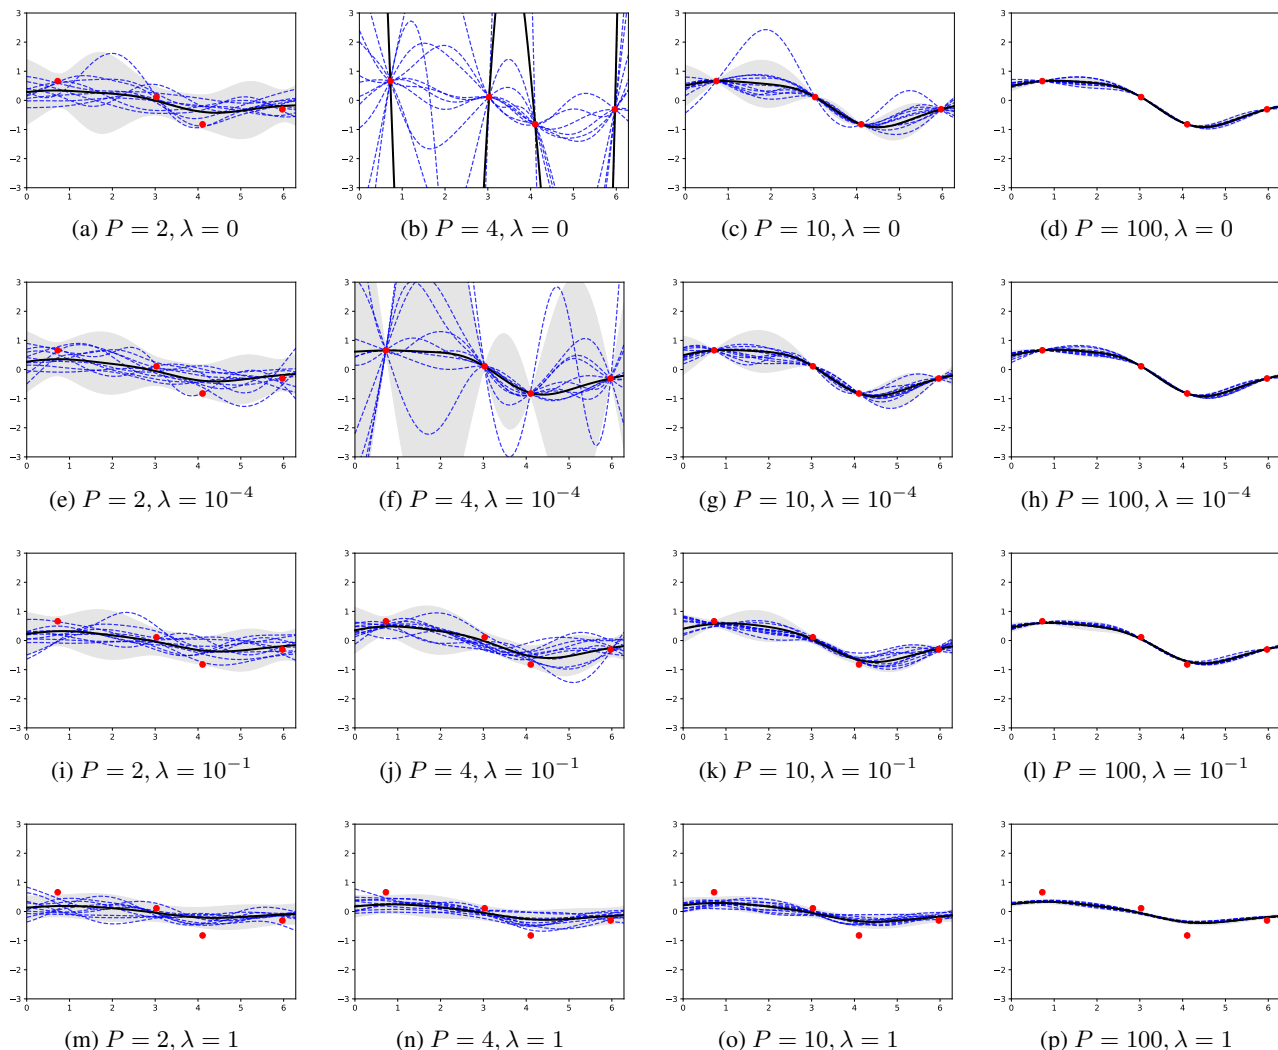

Figure 1. Distribution of the RF predictor. Red dots represent a sinusoidal dataset  $y_i = \sin(x_i)$  for  $N = 4$  points  $x_i$  in  $[0, 2\pi)$ . For  $P \in \{2, 4, 10, 100\}$  and  $\lambda \in \{0, 10^{-4}, 10^{-1}, 1\}$ , we sample ten RF predictors (blue dashed lines) and compute empirically the average RF predictor (black lines) with  $\pm 2$  standard deviations intervals (shaded regions).

**B.2. Evolution of the Effective Ridge  $\tilde{\lambda}$** 

In Figure 2, we show how the effective ridge  $\tilde{\lambda}$  and its derivative  $\partial_\lambda \tilde{\lambda}$  evolve for the selected eigenvalue spectra with various decays (exponential or polynomial) as a function of  $\gamma$  and  $\lambda$ . In Figure 3, we compare the evolution of  $\tilde{\lambda}$  for various  $N$ .

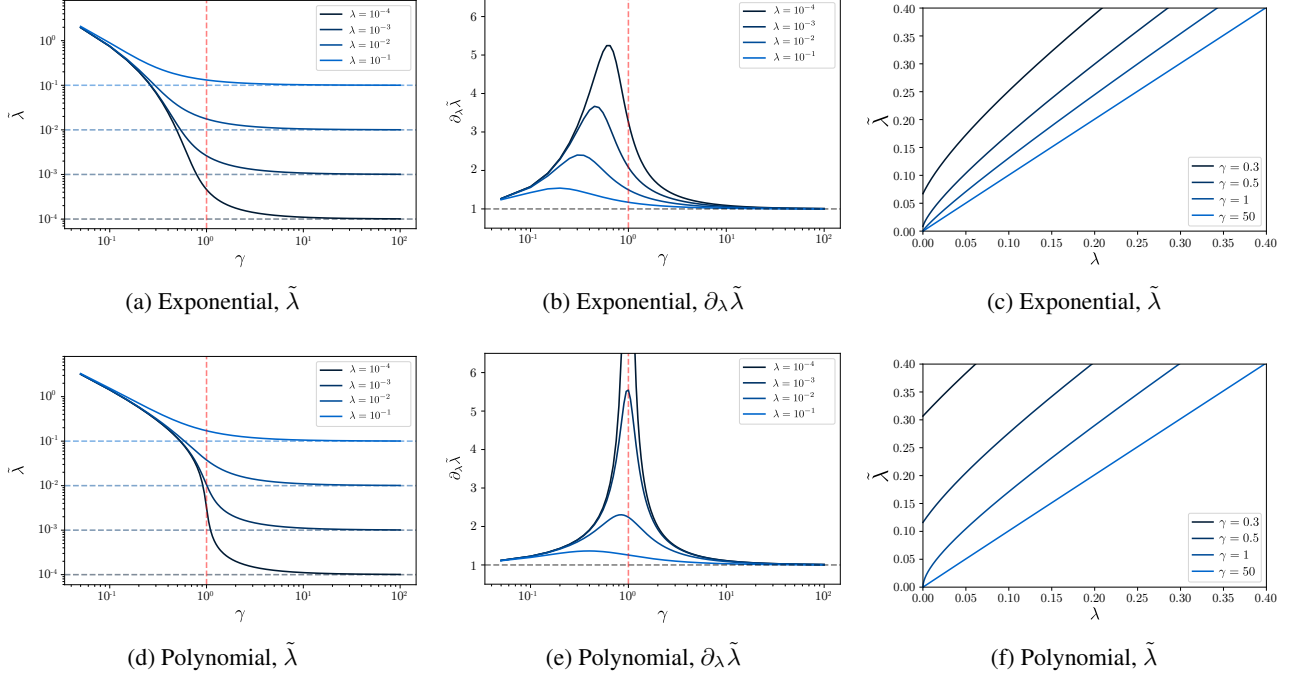

Figure 2. Evolution of the effective ridge  $\tilde{\lambda}$  and its derivative  $\partial_\lambda \tilde{\lambda}$  for various levels of ridge  $\lambda$  (or  $\gamma$ ) and for  $N = 20$ . We consider two different decays for  $d_1, \dots, d_N$ : (i) exponential decay in  $i$  (i.e.  $d_i = e^{-\frac{(i-1)}{2}}$ , top plots) and (ii) polynomial decay in  $i$  (i.e.  $d_i = \frac{1}{i}$ , bottom plots).

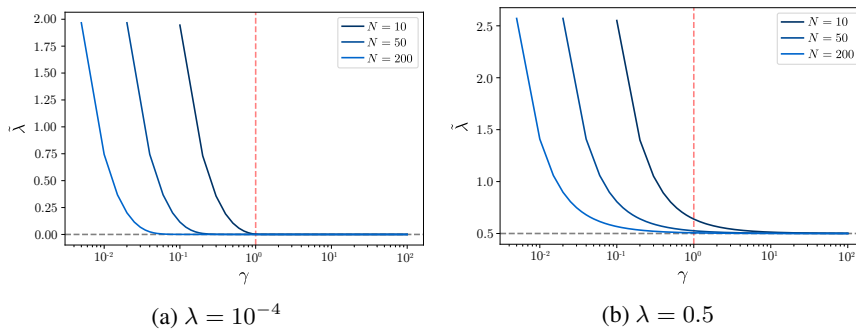

Figure 3. Evolution of effective ridge  $\tilde{\lambda}$  as a function of  $\gamma$  for two ridges (a)  $\lambda = 10^{-4}$  and (b)  $\lambda = 0.5$  and for various  $N$ . We consider an exponential decay for  $d_1, \dots, d_N$ , i.e.  $d_i = e^{-\frac{(i-1)}{2}}$ .

### B.3. Eigenvalues of $A_\lambda$

The (random) prediction  $\hat{y}$  on the training data is given by  $\hat{y} = A_\lambda y$  where  $A_\lambda = F(F^T F + \lambda I)^{-1} F^T$ . The average  $\lambda$ -RF predictor is  $\mathbb{E}[\hat{f}_\lambda^{(RF)}(x)] = K(x, X)K(X, X)^{-1}\mathbb{E}[A_\lambda]y$ . We denote by  $\tilde{d}_1, \dots, \tilde{d}_N$  the eigenvalues of  $\mathbb{E}[A_\lambda]$ . By Proposition C.7, the  $\tilde{d}_i$ 's converge to the eigenvalues  $\frac{d_1}{d_1 + \lambda}, \dots, \frac{d_N}{d_N + \lambda}$  of  $K(K + \lambda I_N)^{-1}$  as  $P$  goes to infinity. We illustrate the evolution of  $\tilde{d}_i$  and their convergence to  $\frac{d_i}{d_i + \lambda}$  for two different eigenvalue spectrums  $d_1, \dots, d_N$ .

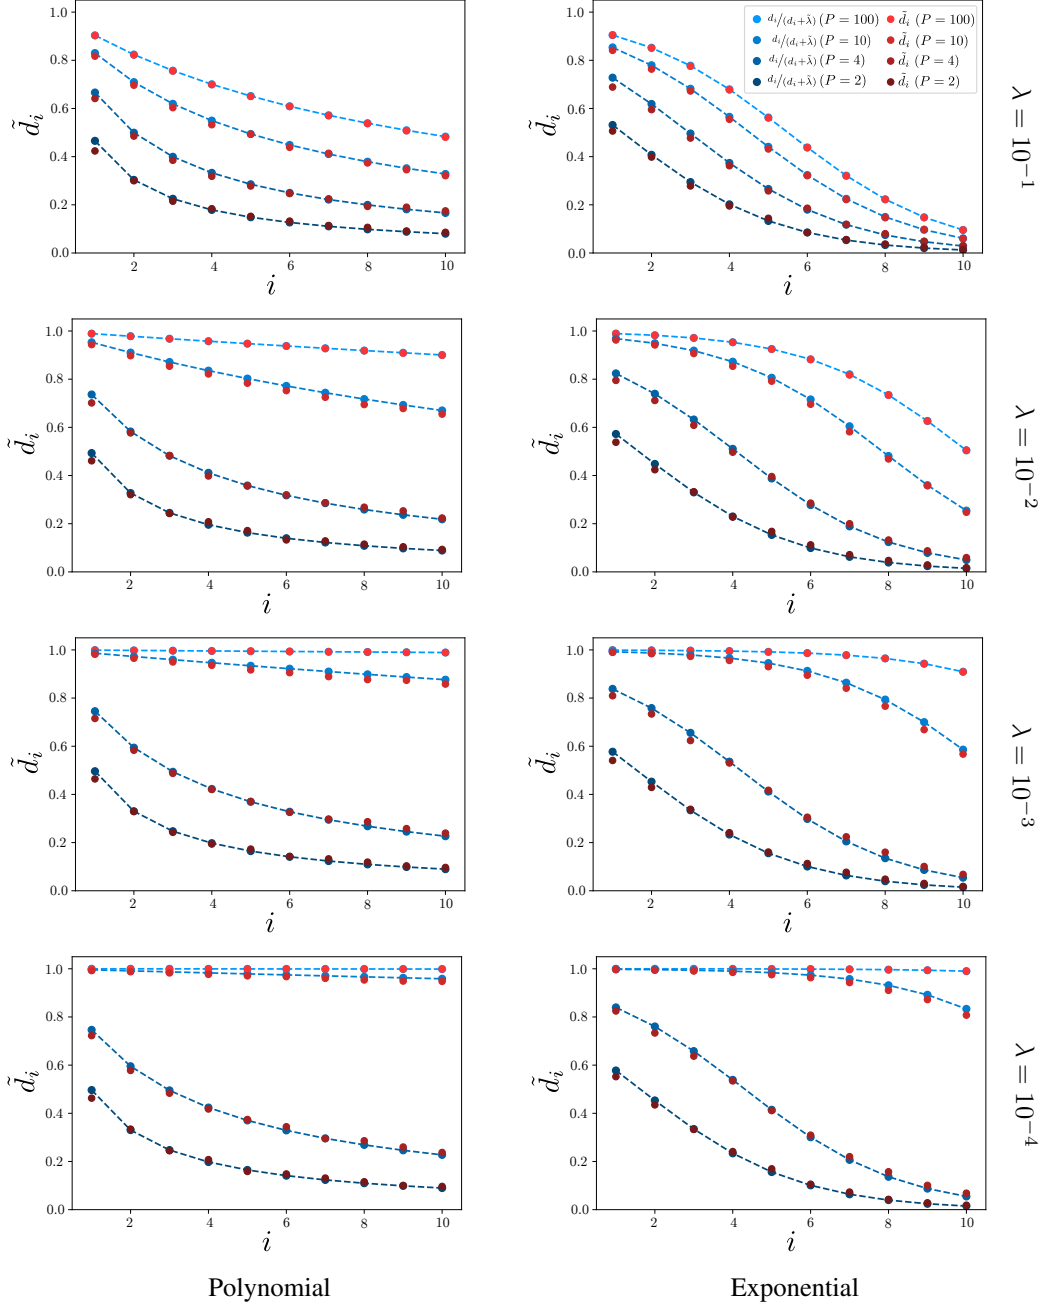

Figure 4. Eigenvalues  $\tilde{d}_1, \dots, \tilde{d}_N$  (red dots) vs. eigenvalues  $\frac{d_1}{d_1 + \lambda}, \dots, \frac{d_N}{d_N + \lambda}$  (blue dots) for  $N = 10$ . We consider various values of  $P$  and two different decays for  $d_1, \dots, d_N$ : (i) exponential decay in  $i$ , i.e.  $d_i = e^{-\frac{(i-1)}{2}}$  (right plots) and (ii) polynomial decay in  $i$ , i.e.  $d_i = \frac{1}{i}$  (left plots).

#### B.4. Average Fourier Features Predictor

The Fourier Features predictor  $\lambda$ -FF is  $\hat{f}^{(FF)}(x) = \frac{1}{\sqrt{P}} \sum_{j=1}^P \hat{\theta}_j \phi^{(j)}(x)$  where  $\phi^{(j)}(x) = \cos(x^T w^{(j)} + b^{(j)})$  and  $\hat{\theta} = F^T (FF^T + \lambda I_N)^{-1} y$  with the data matrix  $F$  as described in Section A.3.

We investigate how close the average  $\lambda$ -FF predictor is to the  $\tilde{\lambda}$ -KRR predictor and we observe the following:

1. The difference of the test errors of the two predictors decreases as  $\gamma$  increases.
2. In the overparameterized regime, i.e.  $P \geq N$ , the test error of the  $\tilde{\lambda}$ -KRR predictor matches with the test error of the  $\lambda$ -FF predictor.
3. For  $N = 1000$ , strong agreement between the two test errors is observed already for  $\gamma > 0.1$ . We also observe that Gaussian features achieve lower (or equal) test error than the Fourier features for all  $\gamma$  in our experiments.

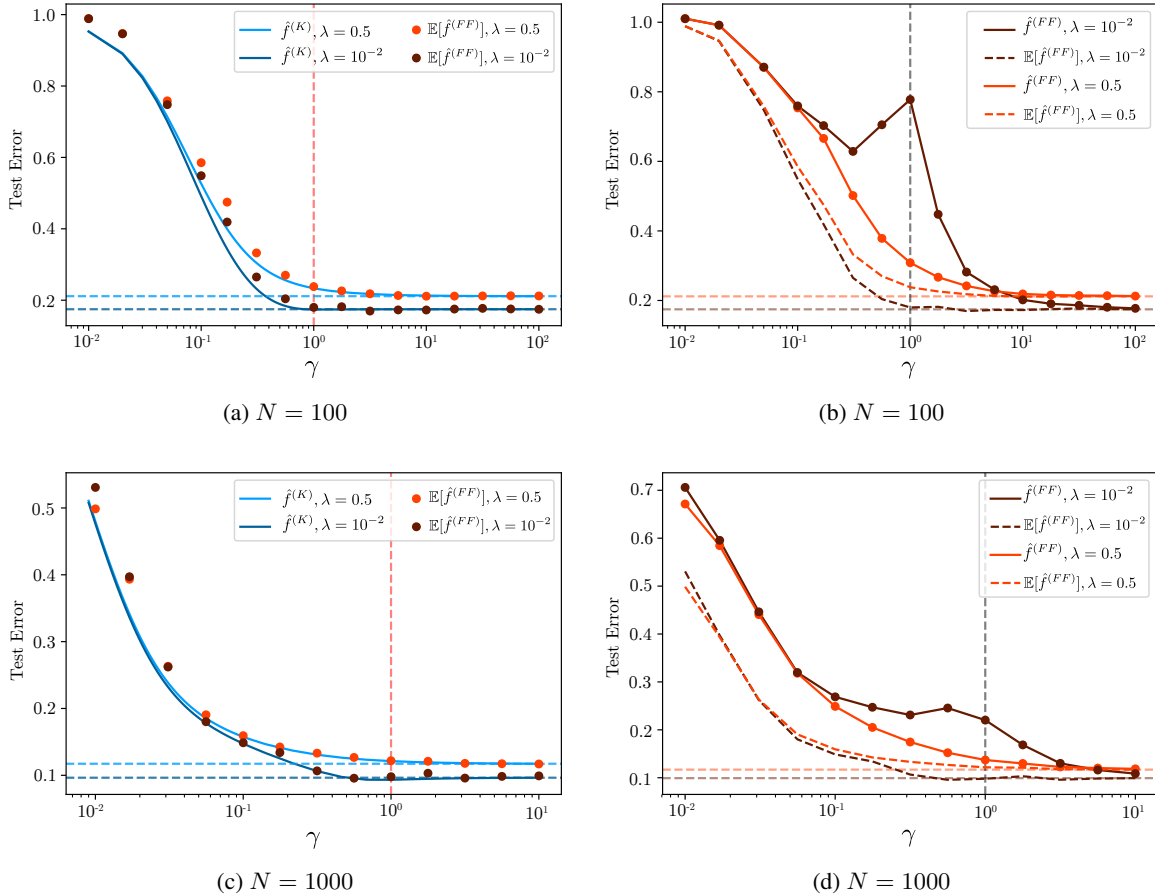

Figure 5. Comparison of the test errors of the average  $\lambda$ -FF predictor and the  $\tilde{\lambda}$ -KRR predictor. In (a) and (c), the test errors of the average  $\lambda$ -FF predictor and of the  $\tilde{\lambda}$ -KRR predictor are reported for various ridge for  $N = 100$  and  $N = 1000$  MNIST data points (top and bottom rows). In (b) and (d), the average test error of the  $\lambda$ -FF predictor and the test error of its average are reported.

## C. Proofs

### C.1. Gaussian Random Features

**Proposition C.1.** Let  $\hat{f}_\lambda^{(RF)}$  be the  $\lambda$ -RF predictor and let  $\hat{y} = F\hat{\theta}$  be the prediction vector on training data, i.e.  $\hat{y}_i = \hat{f}_\lambda^{(RF)}(x_i)$ . The process  $\hat{f}_\lambda^{(RF)}$  is a mixture of Gaussians: conditioned on  $F$ , we have that  $\hat{f}_\lambda^{(RF)}$  is a Gaussian process. The mean and covariance of  $\hat{f}_\lambda^{(RF)}$  conditioned on  $F$  are given by

$$\mathbb{E}[\hat{f}_\lambda^{(RF)}(x)|F] = K(x, X)K(X, X)^{-1}\hat{y}, \quad (1)$$

$$\text{Cov}[\hat{f}_\lambda^{(RF)}(x), \hat{f}_\lambda^{(RF)}(x')|F] = \frac{\|\hat{\theta}\|^2}{P}\tilde{K}(x, x') \quad (2)$$

where  $\tilde{K}(x, x') = K(x, x') - K(x, X)K(X, X)^{-1}K(X, x')$  denotes the posterior covariance kernel.

*Proof.* Let  $F = (\frac{1}{\sqrt{P}}f^{(j)}(x_i))_{i,j}$  be the  $N \times P$  matrix of values of the random features on the training set. By definition,  $\hat{f}_\lambda^{(RF)} = \frac{1}{\sqrt{P}}\sum_{p=1}^P\hat{\theta}_p f^{(p)}$ . Conditioned on the matrix  $F$ , the optimal parameters  $(\hat{\theta}_p)_p$  are not random and  $(f^{(p)})_p$  is still Gaussian, hence, conditioned on the matrix  $F$ , the process  $\hat{f}_\lambda^{(RF)}$  is a mixture of Gaussians. Moreover, conditioned on the matrix  $F$ , for any  $p, p'$ ,  $f^{(p)}$  and  $f^{(p')}$  remain independent, hence

$$\begin{aligned} \mathbb{E}[\hat{f}_\lambda^{(RF)}(x) | F] &= \frac{1}{\sqrt{P}}\sum_{p=1}^P\hat{\theta}_p\mathbb{E}[f^{(p)}(x) | f_N^{(p)}] \\ \text{Cov}[\hat{f}_\lambda^{(RF)}(x), \hat{f}_\lambda^{(RF)}(x') | F] &= \frac{1}{P}\sum_{p=1}^P\hat{\theta}_p^2\text{Cov}[f^{(p)}(x), f^{(p)}(x') | f_N^{(p)}]. \end{aligned}$$

where we have set  $f_N^{(p)} = (f^{(p)}(x_i))_i \in \mathbb{R}^N$ . The value of  $\mathbb{E}[f^{(p)}(x) | f_N^{(p)}]$  and  $\text{Cov}[f^{(p)}(x), f^{(p)}(x') | f_N^{(p)}]$  are obtained from classical results on Gaussian conditional distributions (Eaton, 2007):

$$\begin{aligned} \mathbb{E}[f^{(p)}(x) | f_N^{(p)}] &= K(x, X)K(X, X)^{-1}f_N^{(p)}, \\ \text{Cov}[f^{(p)}(x), f^{(p)}(x') | f_N^{(p)}] &= \tilde{K}(x, x'), \end{aligned}$$

where  $\tilde{K}(x, x') = K(x, x') - K(x, X)K(X, X)^{-1}K(X, x')$ . Thus, conditioned on  $F$ , the predictor  $\hat{f}_\lambda^{(RF)}$  has expectation:

$$\mathbb{E}[\hat{f}_\lambda^{(RF)}(x) | F] = K(x, X)K(X, X)^{-1}\frac{1}{\sqrt{P}}\sum_{p=1}^P\hat{\theta}_p f_N^{(p)} = K(x, X)K(X, X)^{-1}\hat{y}$$

and covariance:

$$\text{Cov}[\hat{f}_\lambda^{(RF)}(x), \hat{f}_\lambda^{(RF)}(x') | F] = \frac{1}{P}\sum_{p=1}^P\hat{\theta}_p^2\tilde{K}(x, x') = \frac{\|\hat{\theta}\|^2}{P}\tilde{K}(x, x').$$

□

### C.2. Generalized Wishart Matrix

**Setup.** In this section, we consider a fixed deterministic matrix  $K$  of size  $N \times N$  which is diagonal positive semi-definite, with eigenvalues  $d_1, \dots, d_N$ . We also consider a  $P \times N$  random matrix  $W$  with i.i.d. standard Gaussian entries.

The key object of study is the  $P \times P$  generalized Wishart random matrix  $F^T F = \frac{1}{P}W K W^T$  and in particular its Stieltjes transform defined on  $z \in \mathbb{C} \setminus \mathbb{R}^+$ , where  $\mathbb{R}^+ = [0, +\infty[$ :

$$m_P(z) = \frac{1}{P}\text{Tr}\left[(F^T F - zI_P)^{-1}\right] = \frac{1}{P}\text{Tr}\left[\left(\frac{1}{P}W K W^T - zI_P\right)^{-1}\right],$$

where  $K$  is a fixed positive semi-definite matrix.

Since  $F^T F$  has positive real eigenvalues  $\lambda_1, \dots, \lambda_P \in \mathbb{R}_+$ , and

$$m_P(z) = \frac{1}{P} \sum_{p=1}^P \frac{1}{\lambda_p - z},$$

we have that for any  $z \in \mathbb{C} \setminus \mathbb{R}^+$ ,

$$|m_P(z)| \leq \frac{1}{d(z, \mathbb{R}_+)},$$

where  $d(z, \mathbb{R}_+) = \inf \{|z - y|, y \in \mathbb{R}^+\}$  is the distance of  $z$  to the positive real line. More precisely,  $m_P(z)$  lies in the convex hull  $\Omega_z = \text{Conv} \left( \left\{ \frac{1}{d-z} : d \in \mathbb{R}_+ \right\} \right)$ . As a consequence, the argument  $\arg(m_P(z)) \in (-\pi, \pi)$  lies between 0 and  $\arg(-\frac{1}{z})$ , i.e.  $m_P(z)$  lies in the cone spanned by 1 and  $-\frac{1}{z}$ .

Our first lemma implies that the Stieljes transform concentrates around its mean as  $N$  and  $P$  go to infinity with  $\gamma = \frac{P}{N}$  fixed.

**Lemma C.2.** *For any integer  $m \in \mathbb{N}$  and any  $z \in \mathbb{C} \setminus \mathbb{R}^+$ , we have*

$$\mathbb{E} [|m_P(z) - \mathbb{E}[m_P(z)]|^m] \leq \mathbf{c} P^{-\frac{m}{2}},$$

where  $\mathbf{c}$  depends on  $z, \gamma$ , and  $m$  only.

*Proof.* The proof follows Step 1 of (Bai & Wang, 2008). Let  $w_1, \dots, w_N$  be the columns of  $W$  from left to right. Let us introduce the  $P \times P$  matrices  $B(z) = \frac{1}{P} W K W^T - z I_P$  and  $B_{(i)}(z) = \frac{1}{P} W_{(i)} K_{(i)} W_{(i)}^T - z I_P$  where  $W_{(i)}$  is the  $P \times (N-1)$  submatrix of  $W$  obtained by removing its  $i$ -th column  $w_i$ , and  $K_{(i)}$  is the  $(N-1) \times (N-1)$  submatrix of  $K$  obtained by removing both its  $i$ -th column and  $i$ -th row. Since the eigenvalues of  $W K W^T$  and  $W_{(i)} K_{(i)} W_{(i)}^T$  are all real and positive,  $B(z)$  and  $B_{(i)}(z)$  are invertible matrices for  $z \notin \mathbb{R}^+$ .

Noticing that

$$B(z) = \frac{1}{P} W K W^T - z I_P = \frac{1}{P} W_{(i)} K_{(i)} W_{(i)}^T - z I_P + \frac{d_i}{P} w_i w_i^T$$

is a rank one perturbation of the matrix  $B_{(i)}(z)$ , by the Sherman–Morrison’s formula, the inverse of  $B(z)$  is given by:

$$B(z)^{-1} = (B_{(i)}(z))^{-1} - \frac{d_i}{P} \frac{1}{1 + \frac{d_i}{P} w_i^T (B_{(i)}(z))^{-1} w_i} (B_{(i)}(z))^{-1} w_i w_i^T (B_{(i)}(z))^{-1}.$$

We denote  $\mathbb{E}_i$  the conditional expectation given  $w_{i+1}, \dots, w_N$ . We have  $\mathbb{E}_0[m_P(z)] = m_P(z)$  and  $\mathbb{E}_N[m_P(z)] = \mathbb{E}[m_P(z)]$ . As a consequence, we get:

$$\begin{aligned} m_P(z) - \mathbb{E}[m_P(z)] &= \sum_{i=1}^N (\mathbb{E}_{i-1}[m_P(z)] - \mathbb{E}_i[m_P(z)]) \\ &= \frac{1}{P} \sum_{i=1}^N (\mathbb{E}_{i-1} - \mathbb{E}_i) [\text{Tr}(B(z)^{-1})] \\ &= \frac{1}{P} \sum_{i=1}^N (\mathbb{E}_{i-1} - \mathbb{E}_i) [\text{Tr}(B(z)^{-1}) - \text{Tr}(B_{(i)}(z)^{-1})]. \end{aligned}$$

The last equality comes from the fact that  $\text{Tr}(B_{(i)}(z)^{-1})$  does not depend on  $w_i$ , hence

$$\mathbb{E}_{i-1} [\text{Tr}(B_{(i)}(z)^{-1})] = \mathbb{E}_i [\text{Tr}(B_{(i)}(z)^{-1})].$$

Let  $g_i : \mathbb{C} \setminus \mathbb{R}^+ \rightarrow \mathbb{C}$  be the holomorphic function given by  $g_i(z) := \frac{1}{P} w_i^T (B_{(i)}(z))^{-1} w_i$ . Its derivative is given by  $g_i'(z) = \frac{1}{P} w_i^T (B_{(i)}(z))^{-2} w_i$ . Hence

$$\begin{aligned} \operatorname{Tr}(B(z)^{-1}) - \operatorname{Tr}(B_{(i)}(z)^{-1}) &= -\frac{\frac{d_i}{P} \operatorname{Tr}\left((B_{(i)}(z))^{-1} w_i w_i^T (B_{(i)}(z))^{-1}\right)}{1 + d_i g_i(z)} \\ &= -\frac{d_i g_i'(z)}{1 + d_i g_i(z)}, \end{aligned}$$

where we used the cyclic property of the trace. We can now bound this difference:

$$\begin{aligned} |\operatorname{Tr}(B(z)^{-1}) - \operatorname{Tr}(B_{(i)}(z)^{-1})| &= \left| \frac{d_i g_i'(z)}{1 + d_i g_i(z)} \right| \\ &\leq \left| \frac{w_i^T (B_{(i)}(z))^{-2} w_i}{w_i^T (B_{(i)}(z))^{-1} w_i} \right| \\ &\leq \max_w \left| \frac{w^T (B_{(i)}(z))^{-2} w}{w^T (B_{(i)}(z))^{-1} w} \right| \\ &\leq \| (B_{(i)}(z))^{-1} \|_{op} = \max_j \left| \frac{1}{\nu_j - z} \right| \leq \frac{1}{d(z, \mathbb{R}^+)}, \end{aligned}$$

where  $\nu_j$  are the eigenvalues of  $\frac{1}{P} W_{(i)} K_{(i)} W_{(i)}^T$ .

The sequence

$$\left( (\mathbb{E}_{N-i} - \mathbb{E}_{N-i+1}) [\operatorname{Tr}(B(z)^{-1}) - \operatorname{Tr}(B_{(N-i+1)}(z)^{-1})] \right)_{i=1, \dots, N}$$

is a martingale difference sequence. Hence, by Burkholder's inequality, there exists a positive constant  $K_m$  such that

$$\begin{aligned} \mathbb{E} [ |m_P(z) - \mathbb{E}[m_P(z)]|^m ] &\leq K_m \frac{1}{P^m} \mathbb{E} \left[ \left( \sum_{i=1}^N |\mathbb{E}_{i-1} - \mathbb{E}_i| (\operatorname{Tr}(B(z)^{-1}) - \operatorname{Tr}(B_{(i)}(z)^{-1})) \right)^2 \right]^{\frac{m}{2}} \\ &\leq K_m \frac{1}{P^m} \left( N \left( \frac{2}{d(z, \mathbb{R}^+)} \right)^2 \right)^{\frac{m}{2}} \\ &\leq K_m \gamma^{-\frac{m}{2}} \left( \frac{2}{d(z, \mathbb{R}^+)} \right)^m P^{-\frac{m}{2}}, \end{aligned}$$

hence the desired result with  $\mathbf{c} = K_m \gamma^{-\frac{m}{2}} \left( \frac{2}{d(z, \mathbb{R}^+)} \right)^m$ .  $\square$

The following lemma, which is reminiscent of Lemma 4.5 in (Au et al., 2018), is a consequence of Wick's formula for Gaussian random variables and is key to prove Lemma C.4.

**Lemma C.3.** *If  $A^{(1)}, \dots, A^{(k)}$  are  $k$  square random matrices of size  $P$  independent from a standard Gaussian vector  $w$  of size  $P$ ,*

$$\mathbb{E} \left[ w^T A^{(1)} w w^T A^{(2)} w \dots w^T A^{(k)} w \right] = \sum_{p \in \mathbf{P}_2(2k)} \sum_{\substack{i_1, \dots, i_{2k} \in \{1, \dots, P\} \\ p \leq \operatorname{Ker}(i_1, \dots, i_{2k})}} \mathbb{E} \left[ A_{i_1 i_2}^{(1)} \dots A_{i_{2k-1} i_{2k}}^{(k)} \right], \quad (3)$$

where  $\mathbf{P}_2(2k)$  is the set of pair partitions of  $\{1, \dots, 2k\}$ ,  $\leq$  is the coarser (i.e.  $p \leq q$  if  $q$  is coarser than  $p$ ), and for any  $i_1, \dots, i_{2k}$  in  $\{1, \dots, P\}$ ,  $\operatorname{Ker}(i_1, \dots, i_{2k})$  is the partition of  $\{1, \dots, 2k\}$  such that two elements  $u$  and  $v$  in  $\{1, \dots, 2k\}$  are in the same block (i.e. pair) of  $\operatorname{Ker}(i_1, \dots, i_{2k})$  if and only if  $i_u = i_v$ .



Furthermore,

$$\begin{aligned} \mathbb{E} \left[ \left( w^T A^{(1)} w - \text{Tr} \left( A^{(1)} \right) \right) \left( w^T A^{(2)} w - \text{Tr} \left( A^{(2)} \right) \right) \dots \left( w^T A^{(k)} w - \text{Tr} \left( A^{(k)} \right) \right) \right] \\ = \sum_{p \in \mathcal{P}_2(2k)} \sum_{\substack{i_1, \dots, i_{2k} \in \{1, \dots, P\} \\ p \leq \text{Ker}(i_1, \dots, i_{2k})}} \mathbb{E} \left[ A_{i_1 i_2}^{(1)} \dots A_{i_{2k-1} i_{2k}}^{(k)} \right], \end{aligned} \quad (4)$$

where  $\mathcal{P}_2(2k)$  : is the subset of partitions  $p$  in  $\mathcal{P}_2(2k)$  for which  $\{2j-1, 2j\}$  is not a block of  $p$  for any  $j \in \{1, \dots, k\}$ .

*Proof.* Expanding the left-hand side of Equation (3), we obtain:

$$\mathbb{E} \left[ \sum_{i_1, \dots, i_{2k} \in \{1, \dots, P\}} w_{i_1} A_{i_1 i_2}^{(1)} w_{i_2} w_{i_3} A_{i_3 i_4}^{(2)} w_{i_4} \dots w_{i_{2k-1}} A_{i_{2k-1} i_{2k}}^{(k)} w_{i_{2k}} \right].$$

Using Wick's formula, we get:

$$\sum_{i_1, \dots, i_{2k} \in \{1, \dots, P\}} \sum_{\substack{p \in \mathcal{P}_2(2k), \\ p \leq \text{Ker}(i_1, \dots, i_{2k})}} \mathbb{E} \left[ A_{i_1 i_2}^{(1)} A_{i_3 i_4}^{(2)} \dots A_{i_{2k-1} i_{2k}}^{(k)} \right],$$

hence, interchanging the order of summation, we recover the left-hand side of Equation (3):

$$\sum_{p \in \mathcal{P}_2(2k)} \sum_{\substack{i_1, \dots, i_{2k} \in \{1, \dots, P\} \\ p \leq \text{Ker}(i_1, \dots, i_{2k})}} \mathbb{E} \left[ A_{i_1 i_2}^{(1)} \dots A_{i_{2k-1} i_{2k}}^{(k)} \right].$$

We now prove Equation (4). Expanding the product, the left-hand side is equal to:

$$\sum_{I \subset \{1, \dots, k\}} (-1)^{k-\#I} \mathbb{E} \left[ \prod_{i \in I} w^T A^{(i)} w \prod_{i \notin I} \text{Tr}(A^{(i)}) \right].$$

Expanding the product and the trace, and using Wick's equation, we obtain: a

$$\sum_{I \subset \{1, \dots, k\}} (-1)^{k-\#I} \sum_{i_1, \dots, i_{2k} \in \{1, \dots, P\}} \sum_{\substack{p \in \mathcal{P}_2(2k), p \leq p_I \\ p \leq \text{Ker}(i_1, \dots, i_{2k})}} \mathbb{E} \left[ A_{i_1 i_2}^{(1)} \dots A_{i_{2k-1} i_{2k}}^{(k)} \right].$$

where  $p_I$  is the partition composed of blocks of size 2 given by  $\{2l, 2l+1\}$  with  $l \notin I$  and the rest of the indices contained in a single block. Interchanging the order of summation, we get:

$$\sum_{i_1, \dots, i_{2k} \in \{1, \dots, P\}} \sum_{\substack{p \in \mathcal{P}_2(2k), \\ p \leq \text{Ker}(i_1, \dots, i_{2k})}} \mathbb{E} \left[ A_{i_1 i_2}^{(1)} \dots A_{i_{2k-1} i_{2k}}^{(k)} \right] \left[ \sum_{\substack{I \subset \{1, \dots, k\}, \\ p \leq p_I}} (-1)^{k-\#I} \right].$$

Since  $\left[ \sum_{I \subset \{1, \dots, k\}} (-1)^{\#I} \right] = \delta_{\{I \subset [k], p \leq p_I\} = \{\{1, \dots, k\}\}}$  and  $\{I \subset [k], p \leq p_I\} = \{\{1, \dots, k\}\}$  if and only if  $p \in \mathcal{P}_2(2k)$ , interchanging a last time the order of summation, we recover the left-hand side of Equation (4):

$$\sum_{p \in \mathcal{P}_2(2k)} \sum_{\substack{i_1, \dots, i_{2k} \in \{1, \dots, P\} \\ p \leq \text{Ker}(i_1, \dots, i_{2k})}} \mathbb{E} \left[ A_{i_1 i_2}^{(1)} \dots A_{i_{2k-1} i_{2k}}^{(k)} \right].$$

□

For any  $z \in \mathbb{C} \setminus \mathbb{R}^+$ , we define the holomorphic function  $g_i : \mathbb{C} \setminus \mathbb{R}^+ \rightarrow \mathbb{C}$  by

$$g_i(z) = \frac{1}{P} w_i^T \left( \frac{1}{P} W_{(i)} K_{(i)} W_{(i)}^T - z I_P \right)^{-1} w_i,$$

where  $W_{(i)}$  is the  $P \times (N-1)$  submatrix of  $W$  obtained by removing its  $i$ -th column  $w_i$ , and  $K_{(i)}$  is the  $(N-1) \times (N-1)$  submatrix of  $K$  obtained by removing both its  $i$ -th column and  $i$ -th row. In the following lemma, we bound the distance of  $g_i(z)$  to its mean. Then we prove that  $\mathbb{E}[g_i(z)]$  is close to the expected Stieljes transform of  $K$ .

**Lemma C.4.** *The random function  $g_i(z)$  satisfies:*

$$\begin{aligned} |\mathbb{E}[g_i(z)] - \mathbb{E}[m_P(z)]| &\leq \frac{\mathbf{c}_0}{P}, \\ \text{Var}(g_i(z)) &\leq \frac{\mathbf{c}_1}{P}, \\ \mathbb{E}[(g_i(z) - \mathbb{E}[g_i(z)])^4] &\leq \frac{\mathbf{c}_2}{P^2}, \\ \mathbb{E}[(g_i(z) - \mathbb{E}[g_i(z)])^8] &\leq \frac{\mathbf{c}_3}{P^4}, \end{aligned}$$

where  $\mathbf{c}_0, \mathbf{c}_1, \mathbf{c}_2$ , and  $\mathbf{c}_3$  depend on  $\gamma$  and  $z$  only.

*Proof.* The random variable  $w_i$  is independent from  $B_{(i)}(z) = \frac{1}{P} W_{(i)} K_{(i)} W_{(i)}^T - z I_P$  since the  $i$ -th column of  $W$  does not appear in the definition of  $B_{(i)}(z)$ . Using Lemma C.3, since there exists a unique pair partition  $p \in \mathbf{P}_2(2)$ , namely  $\{\{1, 2\}\}$ , the expectation of  $g_i(z)$  is given by

$$\mathbb{E}[g_i(z)] = \frac{1}{P} \mathbb{E}[\text{Tr}[B_{(i)}(z)^{-1}]].$$

Recall that  $\mathbb{E}[m_P(z)] = \frac{1}{P} \mathbb{E}[\text{Tr}[B(z)^{-1}]]$  and  $|\text{Tr}(B(z)^{-1}) - \text{Tr}(B_{(i)}(z)^{-1})| \leq \frac{1}{d(z, \mathbb{R}^+)}$  (from the proof of Lemma C.2). Hence

$$|\mathbb{E}[g_i(z)] - \mathbb{E}[m_P(z)]| \leq \frac{1}{P} \mathbb{E}[|\text{Tr}(B(z)^{-1}) - \text{Tr}(B_{(i)}(z)^{-1})|] \leq \frac{1}{P} \frac{1}{d(z, \mathbb{R}^+)}.$$

which proves the first assertion with  $\mathbf{c}_0 = \frac{1}{d(z, \mathbb{R}^+)}$ .

Now, let us consider the variance of  $g_i(z)$ . Using our previous computation of  $\mathbb{E}[g_i(z)]$ , we have

$$\text{Var}(g_i(z)) = \mathbb{E} \left[ w_i^T \frac{(B_{(i)}(z))^{-1}}{P} w_i w_i^T \frac{(B_{(i)}(z))^{-1}}{P} w_i \right] - \mathbb{E} \left[ \frac{1}{P} \text{Tr}[B_{(i)}(z)^{-1}] \right]^2.$$

The first term can be computed using the first assertion of Lemma C.3: there are 2 matrices involved, thus we have to sum over 3 pair partitions. A simplification arises since  $\frac{(B_{(i)}(z))^{-1}}{P}$  is symmetric: the partition  $\{\{1, 2\}, \{3, 4\}\}$  yields  $\mathbb{E} \left[ \left( \text{Tr} \left[ \frac{(B_{(i)}(z))^{-1}}{P} \right] \right)^2 \right]$  whereas both  $\{\{1, 3\}, \{2, 4\}\}$  and  $\{\{1, 4\}, \{2, 3\}\}$  yield  $\mathbb{E} \left[ \text{Tr} \left[ \frac{(B_{(i)}(z))^{-2}}{P^2} \right] \right]$ .

Thus, the variance of  $g_i(z)$  is given by:

$$\text{Var}(g_i(z)) = 2 \mathbb{E} \left[ \text{Tr} \left[ \frac{(B_{(i)}(z))^{-2}}{P^2} \right] \right] + \mathbb{E} \left[ \left( \frac{1}{P} \text{Tr} \left[ (B_{(i)}(z))^{-1} \right] \right)^2 \right] - \mathbb{E} \left[ \frac{1}{P} \text{Tr} \left[ (B_{(i)}(z))^{-1} \right] \right]^2$$

hence is given by a sum of two terms:

$$\text{Var}(g_i(z)) = \frac{2}{P} \mathbb{E} \left[ \frac{1}{P} \text{Tr} \left[ (B_{(i)}(z))^{-2} \right] \right] + \text{Var} \left( \frac{1}{P} \text{Tr} \left[ (B_{(i)}(z))^{-1} \right] \right).$$

Using the same arguments as those explained for the bound on the Stieljes transform, the first term is bounded by  $\frac{2}{P d(z, \mathbb{R}^+)^2}$ . In order to bound the second term, we apply Lemma C.2 for  $W_{(i)}$  and  $K_{(i)}$  in place of  $W$  and  $K$ . The second term is bounded by  $\frac{\mathbf{c}}{P}$ , hence the bound  $\text{Var}(g_i(z)) \leq \frac{\mathbf{c}_1}{P}$ .

Finally, we prove the bound on the fourth moment of  $g_i(z) - \mathbb{E}[g_i(z)]$ . We denote  $m_{(i)}(z) = \frac{1}{P} \text{Tr} \left[ (B_{(i)}(z))^{-1} \right]$ . Recall that  $\mathbb{E}[g_i(z)] = \mathbb{E}[m_{(i)}(z)]$ . Using the convexity of  $t \mapsto t^4$ , we have

$$\begin{aligned} \mathbb{E} \left[ (g_i(z) - \mathbb{E}[g_i(z)])^4 \right] &= \mathbb{E} \left[ (g_i(z) - m_{(i)}(z) + m_{(i)}(z) - \mathbb{E}[m_{(i)}(z)])^4 \right] \\ &\leq 8\mathbb{E} \left[ (g_i(z) - m_{(i)}(z))^4 \right] + 8\mathbb{E} \left[ (m_{(i)}(z) - \mathbb{E}[m_{(i)}(z)])^4 \right]. \end{aligned}$$

We bound the second term using the concentration of the Stieljes transform (Lemma C.2): it is bounded by  $\frac{8c}{P^2}$ . The first term is bounded using the second assertion of Lemma C.3. Using the symmetry of  $B_{(i)}(z)$ , the partitions in  $\mathbf{P}_2(4)$  yield two different terms, namely:

1.  $\frac{1}{P^2} \mathbb{E} \left[ \left( \frac{1}{P} \text{Tr} \left[ (B_{(i)}(z))^{-2} \right] \right)^2 \right]$ , for example if  $p = \{\{1, 3\}, \{2, 4\}, \{5, 7\}, \{6, 8\}\}$
2.  $\frac{1}{P^3} \mathbb{E} \left[ \frac{1}{P} \text{Tr} \left[ (B_{(i)}(z))^{-4} \right] \right]$ , for example if  $p = \{\{2, 3\}, \{4, 5\}, \{6, 7\}, \{8, 1\}\}$ .

We bound the two terms using the same arguments as those explained for the bound on the Stieljes transform at the beginning of the section. The first term is bounded by  $\frac{d(z, \mathbb{R}^+)^{-4}}{P^2}$  and the second term by  $\frac{d(z, \mathbb{R}^+)^{-4}}{P^3}$  hence the bound  $\mathbb{E} \left[ (g_i(z) - \mathbb{E}[g_i(z)])^4 \right] \leq \frac{c_2}{P^2}$ .

The bound  $\mathbb{E}[(g_i(z) - \mathbb{E}[g_i(z)])^8] \leq \frac{c_3}{P^4}$  is obtained in a similar way, using the second assertion of Lemma C.3 and simple bounds on the Stieljes transform.  $\square$

In the next proposition we show that the Stieljes transform  $m_P(z)$  is close in expectation to the solution of a fixed point equation.

**Proposition C.5.** For any  $z \in \mathbb{H}_{<0} = \{z : \text{Re}(z) < 0\}$ ,

$$|\mathbb{E}[m_P(z)] - \tilde{m}(z)| \leq \frac{\mathbf{e}}{P},$$

where  $\mathbf{e}$  depends on  $z$ ,  $\gamma$ , and  $\frac{1}{N} \text{Tr}(K)$  only and where  $\tilde{m}(z)$  is the unique solution in the cone  $\mathcal{C}_z := \{u - \frac{1}{z}v : u, v \in \mathbb{R}_+\}$  spanned by 1 and  $-\frac{1}{z}$  of the equation

$$\gamma = \frac{1}{N} \sum_{i=1}^N \frac{d_i \tilde{m}(z)}{1 + d_i \tilde{m}(z)} - \gamma z \tilde{m}(z).$$

*Proof.* We use the same notation as in the previous proofs, namely  $B(z) = \frac{1}{P} W K W^T - z I_P$ ,  $B_{(i)}(z) = \frac{1}{P} W_{(i)} K_{(i)} W_{(i)}^T - z I_P$  and  $g_i(z) = \frac{1}{P} w_i^T (B_{(i)}(z))^{-1} w_i$ . Let  $\nu_j \geq 0$ ,  $j = 1, \dots, P$  be the spectrum of the positive semi-definite matrix  $\frac{1}{P} W_{(i)} K_{(i)} W_{(i)}^T$ . After diagonalization, we have

$$B_{(i)}(z)^{-1} = O^T \text{diag} \left( \frac{1}{\nu_1 - z}, \dots, \frac{1}{\nu_P - z} \right) O,$$

with  $O$  an orthogonal matrix. Then

$$g_i(z) = \frac{1}{P} \text{Tr} \left( (B_{(i)}(z))^{-1} w_i w_i^T \right) = \frac{1}{P} \sum_{j=1}^P \frac{((O w_i)_{jj})^2}{\nu_j - z}. \quad (5)$$

Since  $z \in \mathbb{H}_{<0}$ , we conclude that  $\Re[g_i(z)] \geq 0$  for all  $i = 1, \dots, P$ .

In order to prove the proposition, the key remark is that, since  $\text{Tr} \left( (\frac{1}{P} W K W^T - z I_P) (B(z))^{-1} \right) = P$ , the Stieljes transform  $m_P(z)$  satisfies the following equation:

$$P = \text{Tr} \left( \frac{1}{P} K W^T B(z)^{-1} W \right) - z P m_P(z).$$

From the proof of Lemma C.2, recall that  $B^{-1}(z) = B_{(i)}^{-1}(z) - \frac{d_i}{P} \frac{1}{1 + \frac{d_i}{P} w_i^T B_{(i)}^{-1}(z) w_i} B_{(i)}^{-1}(z) w_i w_i^T B_{(i)}^{-1}(z)$ , hence:

$$\begin{aligned} \frac{1}{P} w_i^T B^{-1}(z) w_i &= g_i(z) - \frac{d_i g_i(z)^2}{1 + d_i g_i(z)} \\ &= \frac{g_i(z)}{1 + d_i g_i(z)}. \end{aligned} \quad (6)$$

Expanding the trace,

$$\mathrm{Tr} \left( \frac{1}{P} K W^T B(z)^{-1} W \right) = \sum_{i=1}^N d_i \frac{1}{P} w_i^T B^{-1}(z) w_i = \sum_{i=1}^N \frac{d_i g_i(z)}{1 + d_i g_i(z)}.$$

Thus, the Stieljes transform  $m_P(z)$  satisfies the following equation  $P = \sum_{i=1}^N \frac{d_i g_i(z)}{1 + d_i g_i(z)} - z P m_P(z)$ , or equivalently

$$\gamma = \frac{1}{N} \sum_{i=1}^N \frac{d_i g_i(z)}{1 + d_i g_i(z)} - z \gamma m_P(z).$$

Recall that  $\gamma > 0$  and  $\mathrm{Re}(z) < 0$ . The Stieljes transform  $m_P(z)$  can be written as a function of  $g_i(z)$  for  $i = 1, \dots, n$ :  $m_P(z) = f(g_1(z), \dots, g_N(z))$  where

$$f(g_1, \dots, g_N) = \frac{1}{\gamma z N} \sum_{i=1}^N \frac{d_i g_i}{1 + d_i g_i} - \frac{1}{z} = -\frac{1}{z} \left( 1 - \frac{1}{\gamma} + \frac{1}{\gamma} \frac{1}{N} \sum_{i=1}^N \frac{1}{1 + d_i g_i} \right).$$

From Lemma C.6, the map  $f(m) = f(m, \dots, m)$  has a unique non-degenerate fixed point  $\tilde{m}(z)$  in the cone  $\mathcal{C}_z$ . We will show that  $\mathbb{E}[m_P(z)]$  is close to  $\tilde{m}(z)$  using the following two steps: we show a non-tight bound  $|\mathbb{E}[m_P(z)] - \tilde{m}(z)| \leq \frac{e'}{\sqrt{P}}$  and use it to obtain the tighter bound  $|\mathbb{E}[m_P(z)] - \tilde{m}(z)| \leq \frac{e}{P}$ .

Let us prove the  $\frac{e'}{\sqrt{P}}$  bound. From Lemma C.6, the distance between  $m_P(z)$  and the fixed point  $\tilde{m}(z)$  of  $f$  is bounded by the distance between  $f(m_P(z), \dots, m_P(z))$  and  $m_P(z)$ . Using the fact that  $m_P(z) = f(g_1(z), \dots, g_N(z))$ , we obtain

$$|\mathbb{E}[m_P(z)] - \tilde{m}(z)| \leq \mathbb{E}[|m_P(z) - \tilde{m}(z)|] \leq \mathbb{E}[|f(m_P(z), \dots, m_P(z)) - f(g_1(z), \dots, g_N(z))|].$$

Recall that for any  $z \in \mathbb{H}_{<0}$ ,  $\Re(g_i(z)) \geq 0$ : we need to study the function  $f$  on  $\mathbb{H}_{\geq 0}^N$  where  $\mathbb{H}_{\geq 0} = \{z \in \mathbb{C} | \Re(z) \geq 0\}$ . On  $\mathbb{H}_{\geq 0}^N$ , the function  $f$  is Lipschitz:

$$|\partial_{g_i} f(g_1, \dots, g_N)| = \left| \frac{1}{\gamma z N} \frac{d_i}{(1 + d_i g_i)^2} \right| \leq \frac{d_i}{\gamma |z| N}.$$

Thus,

$$\mathbb{E}[|f(m_P(z), \dots, m_P(z)) - f(g_1(z), \dots, g_N(z))|] \leq \sum_{i=1}^N \frac{d_i}{\gamma |z| N} \mathbb{E}[|m_P(z) - g_i(z)|].$$

Since

$$\mathbb{E}[|m_P(z) - g_i(z)|] \leq \mathbb{E}[|m_P(z) - \mathbb{E}[m_P(z)]|] + |\mathbb{E}[m_P(z)] - \mathbb{E}[g_i(z)]| + \mathbb{E}[|g_i(z) - \mathbb{E}[g_i(z)]|],$$

using Lemmas C.2 and C.4, we get that  $\mathbb{E}[|m_P(z) - g_i(z)|] \leq \frac{\mathbf{d}}{\sqrt{P}}$ , where  $\mathbf{d}$  depends on  $\gamma$  and  $z$  only. This implies that

$$\mathbb{E}[|f(m_P(z), \dots, m_P(z)) - f(g_1(z), \dots, g_N(z))|] \leq \frac{1}{\sqrt{P}} \frac{\mathbf{d}}{N} \mathrm{Tr}(K),$$

which allows to conclude that  $|\mathbb{E}[m_P(z)] - \tilde{m}(z)| \leq \frac{e'}{\sqrt{P}}$  where  $e'$  depends on  $\gamma$ ,  $z$  and  $\frac{1}{N} \mathrm{Tr}(K)$  only.

We strengthen this inequality and show the  $\frac{\mathfrak{e}}{P}$  bound. Using again Lemma C.6, we bound the distance between  $\mathbb{E}[m_P(z)]$  and the fixed point  $\tilde{m}(z)$  by

$$|\mathbb{E}[m_P(z)] - \tilde{m}(z)| \leq |\mathbb{E}[f(g_1(z), \dots, g_N(z))] - f(\mathbb{E}[m_P(z)], \dots, \mathbb{E}[m_P(z)])|$$

and study the r.h.s. using a Taylor approximation of  $f$  near  $\mathbb{E}[m_P(z)]$ . For  $i = 1, \dots, N$  and  $m_0 \in \mathbb{H}_{\geq 0}$ , let  $T_{m_0}h_i$  be the first order Taylor approximation of the map  $h_i : m \mapsto \frac{1}{1+d_i m}$  at a point  $m_0$ . The error of the first order Taylor approximation is given by

$$h_i(m) - T_{m_0}h_i(m) = \frac{1}{1+d_i m} - \left( \frac{1}{1+d_i m_0} - \frac{d_i(m-m_0)}{(1+d_i m_0)^2} \right) = \frac{d_i^2(m-m_0)^2}{(1+d_i m)(1+d_i m_0)^2},$$

which, for  $m \in \mathbb{H}_{\geq 0}$  can be upper bounded by a quadratic term:

$$|h_i(m) - T_{m_0}h_i(m)| = \left| \frac{d_i^2}{(1+d_i m)(1+d_i m_0)^2} \right| |m_0 - m|^2 \leq \frac{1}{|m_0|^2} |m_0 - m|^2. \quad (7)$$

The first order Taylor approximation  $Tf$  of  $f$  at the  $N$ -tuple  $(\mathbb{E}[m_P(z)], \dots, \mathbb{E}[m_P(z)])$  is

$$Tf(g_1, \dots, g_N) = -\frac{1}{z} \left( 1 - \frac{1}{\gamma} + \frac{1}{\gamma} \frac{1}{N} \sum_{i=1}^N T_{\mathbb{E}[m_P(z)]} h_i(g_i) \right).$$

Using this Taylor approximation,  $\mathbb{E}[f(g_1(z), \dots, g_N(z))] - f(\mathbb{E}[m_P(z)], \dots, \mathbb{E}[m_P(z)])$  is equal to:

$$\mathbb{E}[Tf(g_1(z), \dots, g_N(z))] - f(\mathbb{E}[m_P(z)], \dots, \mathbb{E}[m_P(z)]) + \mathbb{E}[f(g_1(z), \dots, g_N(z)) - Tf(g_1(z), \dots, g_N(z))].$$

Using Lemma C.4, we get

$$\begin{aligned} |\mathbb{E}[f(g_1(z), \dots, g_N(z)) - Tf(g_1(z), \dots, g_N(z))]| &\leq \frac{1}{|z|} \frac{1}{\gamma} \frac{1}{N} \sum_{i=1}^N \frac{1}{|\mathbb{E}[m_P(z)]|^2} \mathbb{E} \left[ |g_i(z) - \mathbb{E}[m_P(z)]|^2 \right] \\ &\leq \frac{1}{P} \frac{\alpha}{|\mathbb{E}[m_P(z)]|^2} \end{aligned}$$

and

$$\begin{aligned} |\mathbb{E}[Tf(g_1(z), \dots, g_N(z))] - f(\mathbb{E}[m_P(z)], \dots, \mathbb{E}[m_P(z)])| &\leq \frac{1}{|z|} \frac{1}{\gamma} \frac{1}{N} \sum_{i=1}^N \frac{d_i |\mathbb{E}[g_i] - \mathbb{E}[m_P(z)]|}{|1+d_i \mathbb{E}[m_P(z)]|^2} \\ &\leq \frac{\beta \left( \frac{1}{N} \text{Tr} K \right)}{P} \end{aligned}$$

where  $\alpha$  and  $\beta$  depends on  $z$  and  $\gamma$  only. From the bounds  $|\mathbb{E}[m_P(z)] - \tilde{m}(z)| \leq \frac{\mathfrak{e}'}{\sqrt{P}}$  and  $|\tilde{m}(z)| \geq (|z| + \frac{1}{N\gamma} \text{Tr}(K))^{-1}$  (Lemma C.6), the bound  $\frac{1}{P} \frac{\alpha}{|\mathbb{E}[m_P(z)]|^2}$  yields a  $\frac{\tilde{\alpha}}{P}$  bound. This implies that  $|\mathbb{E}[m_P(z)] - f(\mathbb{E}[m_P(z)], \dots, \mathbb{E}[m_P(z)])| \leq \frac{\mathfrak{e}}{P}$ , hence the desired inequality  $|\mathbb{E}[m_P(z)] - \tilde{m}(z)| \leq \frac{\mathfrak{e}}{P}$ .  $\square$

For the proof of Proposition C.5, we have used the fact that the map  $f_z$  introduced therein has a unique non-degenerate fixed point in the cone  $\mathcal{C}_z := \{u - \frac{1}{z}v : u, v \in \mathbb{R}_+\}$ . We now proceed with proving this statement.

**Lemma C.6.** *Let  $d_1, \dots, d_n \geq 0$  and let  $\gamma \geq 0$ . For any fixed  $z \in \mathbb{H}_{< 0}$ , let  $f_z : \mathbb{H}_{\geq 0} \rightarrow \mathbb{C}$  be the function  $t \mapsto f_z(t) = -\frac{1}{z} \left( 1 - \frac{1}{\gamma} \frac{1}{N} \sum_{i=1}^N \frac{d_i t}{1+d_i t} \right)$ . Let  $\mathcal{C}_z := \{u - \frac{1}{z}v : u, v \in \mathbb{R}_+\}$  be the convex region spanned by the half-lines  $\mathbb{R}_+$  and  $-\frac{1}{z}\mathbb{R}_+$ . Then for every  $z \in \mathbb{H}_{< 0}$  there exists a unique fixed point  $\tilde{t}(z) \in \mathcal{C}_z$  such that  $\tilde{t}(z) = f_z(\tilde{t}(z))$ . The map  $\tilde{t} : z \mapsto \tilde{t}(z)$  is holomorphic in  $\mathbb{H}_{< 0}$  and*

$$|\tilde{t}(z)| \geq \left( |z| + \frac{\sum_i d_i}{\gamma N} \right)^{-1}.$$

Furthermore for every  $z \in \mathbb{H}_{< 0}$  and any  $t \in \mathbb{H}_{\geq 0}$ , one has

$$|t - \tilde{t}(z)| \leq |t - f_z(t)|.$$

*Proof.* By means of Schwarz reflection principle, we can assume that  $\Im(z) \geq 0$ . Let  $z \in \mathbb{H}_{<0}$  and let  $\Pi_z := \{-\frac{w}{z} : \Im(w) \leq 0\}$  and let  $\mathcal{C}_z$  be the wedged region  $\mathcal{C}_z := \Pi_z \cap \{w \in \mathbb{C} : \Im(w) \geq 0\}$ . To show the existence of a fixed point in  $\mathcal{C}_z$  we show that 0 is in the image of the function  $\psi : t \mapsto f_z(t) - t$ . Note that since  $d_i \geq 0$ , the eventual poles of  $f_z$  are all strictly negative real numbers, hence  $\psi : \mathcal{C}_z \rightarrow \mathbb{C}$  is an holomorphic function.

To prove that  $0 \in \psi(\mathcal{C}_z)$  we proceed with a geometrical reasoning: the image  $\psi(\mathcal{C}_z)$  is (one of) the region of the plane confined by  $\psi(\partial\mathcal{C}_z)$ , so we only need to “draw”  $\psi(\partial\mathcal{C}_z)$  and show that 0 belongs to the “good” connected component confined by it.

The boundary of  $\mathcal{C}_z$  is made up of two half-lines  $\mathbb{R}_+$  and  $-\frac{1}{z}\mathbb{R}_+$ . Under the map  $f_z$ , 0 is mapped to  $-\frac{1}{z}$  and  $\infty$  is mapped to  $-\frac{1-\frac{1}{\gamma}}{z}$ , the two half-lines are hence mapped to paths from  $-\frac{1}{z}$  to  $-\frac{1-\frac{1}{\gamma}}{z}$ . Now under  $\psi$  the half-lines will be mapped to paths going  $-\frac{1}{z}$  to  $\infty$  because by our assumption  $-\frac{1}{z}$  lies in the upper right quadrant, we will show that the image of  $\mathbb{R}_+$  under  $\phi$  goes ‘above’ the origin while the image of  $-\frac{1}{z}\mathbb{R}_+$  goes ‘under’ the origin:

- $\mathbb{R}_+$  is mapped under  $f_z$  to the segment  $-\frac{1}{z}[1, 1 - \frac{1}{\gamma}]$ , as a result, its map under  $\psi$  lies in the Minkowski sum  $-\frac{1}{z}[1, 1 - \frac{1}{\gamma}] + (-\mathbb{R}_+)$  which is contained in  $\mathbb{C} \setminus \Pi_z$ .
- For any  $t \in -\frac{1}{z}\mathbb{R}_+$  we have for all  $d_i$

$$\Im\left(\frac{d_i t}{1 + d_i t}\right) = \Im\left(1 - \frac{1}{1 + d_i t}\right) = \Im\left(\frac{1}{1 + d_i t}\right) \leq 0,$$

since  $\Im(t) \geq 0$ . As a result the image of  $-\frac{1}{z}\mathbb{R}_+$  under  $f_z$  lies in  $\Pi_z$  and its image under  $\psi$  lies in the Minkovski sum  $\Pi_z + (-\frac{1}{z}\mathbb{R}_+) = \Pi_z$ .

Thus we can conclude that  $0 \in \psi(\mathcal{C}_z)$ , which shows that there exists at least a fixed point  $\tilde{m}$  in  $\mathcal{C}_z$ .

We observe that, for every  $t \in \mathcal{C}_z$ , the derivative of  $f$  has negative real part:

$$\begin{aligned} \operatorname{Re}(f'_z(t)) &= \frac{1}{\gamma} \frac{1}{N} \sum_{i=1}^N \operatorname{Re}\left(\frac{d_i}{z(1 + d_i t)^2}\right) \\ &= \frac{1}{\gamma} \frac{1}{N} \sum_{i=1}^N \frac{d_i [\Re(z) + 2d_i \Re(z)\Re(t) - 2d_i \Im(z)\Im(t) + d_i^2 \Re(zt^2)]}{|z|^2 |1 + d_i t|^4} \leq 0, \end{aligned}$$

where we concluded the last inequality by using that  $\Re(z) \leq 0$ ,  $\Re(t) \geq 0$ ,  $\Im(z)\Im(t) \geq 0$  and  $\Re(zt^2) \leq 0$ . Thus, since for no point  $t \in \mathcal{C}_z$  has  $f'_z(t) = 1$ , any fixed point of  $f_z$  is a simple fixed point.

We now proceed to show the uniqueness of the fixed point in the region  $\mathcal{C}_z$ . Suppose there are two fixed points  $t_1$  and  $t_2$ , then

$$\begin{aligned} t_1 - t_2 &= f_z(t_1) - f_z(t_2) \\ &= (t_1 - t_2) \frac{1}{z} \frac{1}{\gamma N} \sum_{i=1}^N \frac{d_i}{(1 + d_i t_1)(1 + d_i t_2)}. \end{aligned}$$

Again, since  $\Re(z) \leq 0$ ,  $\Re(t_1), \Re(t_2) \geq 0$ ,  $\Im(z)\Im(t_1), \Im(z)\Im(t_2) \geq 0$  and  $\Re(zt_1 t_2) \leq 0$ , the factor  $\frac{1}{z} \frac{1}{\gamma N} \sum_{i=1}^N \frac{d_i}{(1 + d_i t_1)(1 + d_i t_2)}$  has negative real part, and thus the identity is possible only if  $t_1 = t_2$ . Let's then  $\tilde{t}(z)$  be the only fixed point in  $\mathcal{C}_z$ .

We proceed now to show that  $|t - f_z(t)| \geq |t - \tilde{t}(z)|$ , i.e. if  $t$  and its image are close, then  $t$  is not too far from being a fixed point, and so it is close to  $\tilde{t}(z)$ .

For any  $t \in \mathcal{C}_z$ , we have

$$\begin{aligned}
 |t - f_z(t)| &= |t - \tilde{t}(z) + f_z(\tilde{t}(z)) - \tilde{f}_z(t)| \\
 &= \left| (t - \tilde{t}(z)) - (t - \tilde{t}(z)) \left( \frac{1}{z} \frac{1}{\gamma N} \sum_{i=1}^N \frac{d_i}{(1+d_i t)(1+d_i \tilde{t}(z))} \right) \right| \\
 &= |t - \tilde{t}(z)| \left| 1 - \frac{1}{z} \frac{1}{\gamma N} \sum_{i=1}^N \frac{d_i}{(1+d_i t)(1+d_i \tilde{t}(z))} \right| \\
 &\geq |t - \tilde{t}(z)|
 \end{aligned}$$

where we have used again that  $\frac{1}{z} \frac{1}{\gamma N} \sum_{i=1}^N \frac{d_i}{(1+d_i t)(1+d_i \tilde{t}(z))}$  has negative real part.

We provide a lower bound on the norm of the fixed point:

$$|\tilde{t}(z)| = \frac{1}{|z|} \left| 1 - \frac{1}{\gamma N} \sum_{i=1}^N \frac{d_i \tilde{t}(z)}{1+d_i \tilde{t}(z)} \right| \geq \frac{1}{|z|} \left( 1 - \frac{1}{\gamma N} \sum_{i=1}^N \left| \frac{d_i \tilde{t}(z)}{1+d_i \tilde{t}(z)} \right| \right) \geq \frac{1}{|z|} \left( 1 - \frac{|\tilde{t}(z)|}{\gamma N} \sum_{i=1}^N d_i \right).$$

hence

$$|\tilde{t}(z)| \geq \left( |z| + \frac{\sum_i d_i}{\gamma N} \right)^{-1}.$$

Finally, note that  $z$  can be expressed from the fixed point  $\tilde{m}$ , hence defining an inverse for the map  $\tilde{t}$ :

$$\tilde{t}^{-1}(\tilde{m}) = z = -\frac{1}{\tilde{m}} \left( 1 - \frac{1}{\gamma N} \sum_{i=1}^N \frac{d_i \tilde{m}}{1+d_i \tilde{m}} \right)$$

because the inverse is holomorphic, so is  $\tilde{t}$ . □

### C.3. Ridge

Using Proposition C.1, in order to have a better description of the distribution of the predictor  $\hat{f}_{\lambda, \gamma}^{(RF)}$ , it remains to study the distributions of both the final labels  $\hat{y}$  on the training set and the parameter norm  $\|\hat{\theta}\|^2$ . In Section C.3.1, we first study the expectation of the final labels  $\hat{y}$ : this allows us to study the loss of the average predictor  $\mathbb{E} \left[ \hat{f}_{\lambda, \gamma}^{(RF)} \right]$ . Then in Section C.3.3, a study of the variance of the predictor allows us to study the average loss of the RF predictor.

#### C.3.1. EXPECTATION OF THE PREDICTOR

The optimal parameters  $\hat{\theta}$  which minimize the regularized MSE loss is given by  $\hat{\theta} = F^T (F F^T + \lambda I_N)^{-1} y$ , or equivalently by  $\hat{\theta} = (F^T F + \lambda)^{-1} F^T y$ . Thus, the final labels take the form  $\hat{y} = A(-\lambda) y$  where  $A(z)$  is the random matrix defined as

$$\begin{aligned}
 A(z) &:= F (F^T F - z I_P)^{-1} F^T \\
 &= \frac{1}{P} K^{\frac{1}{2}} W^T \left( \frac{1}{P} W K W^T - z I_P \right)^{-1} W K^{\frac{1}{2}}.
 \end{aligned}$$

Note that the matrix  $A_\lambda$  defined in the proof sketch of Theorem 4.1 in the main text is given by  $A_\lambda = A(-\lambda)$ .

**Proposition C.7.** *For any  $\gamma > 0$ , any  $z \in \mathbb{H}_{<0}$ , and any symmetric positive definite matrix  $K$ ,*

$$\|\mathbb{E}[A(z)] - K(K + \tilde{\lambda}(-z)I_N)^{-1}\|_{op} \leq \frac{c}{P}, \tag{8}$$

where  $\tilde{\lambda}(z) := \frac{1}{\tilde{m}(-z)}$  and  $c > 0$  depends on  $z$ ,  $\gamma$  and  $\frac{1}{N} \text{Tr}(K)$  only.

*Proof.* Since the distribution of  $W$  is invariant under orthogonal transformations, by applying a change of basis, in order to prove Inequality (8), we may assume that  $K$  is diagonal with diagonal entries  $d_1, \dots, d_N$ . Denoting  $w_1, \dots, w_N$  the columns of  $W$ , for any  $i, j = 1, \dots, N$ ,

$$(A(z))_{ij} = \frac{1}{P} \sqrt{d_i d_j} w_i^T \left( \frac{1}{P} W K W^T - z I_P \right)^{-1} w_j,$$

where  $W K W^T = \sum_{i=1}^N d_i w_i w_i^T$ . Replacing  $w_i$  by  $-w_i$  does not change the law  $W$  hence does not change the law of  $(A(z))_{ij}$ . Since  $W K W^T$  is invariant under this change of sign, we get that for  $i \neq j$ ,  $\mathbb{E}[(A(z))_{ij}] = -\mathbb{E}[(A(z))_{ij}]$ , hence the off-diagonal terms of  $\mathbb{E}[A(z)]$  vanish.

Consider a diagonal term  $(A(z))_{ii}$ . From Equation (6), we get

$$(A(z))_{ii} = \frac{d_i}{P} w_i^T B^{-1}(z) w_i = \frac{d_i g_i(z)}{1 + d_i g_i(z)}. \quad (9)$$

By Lemma C.4,  $g_i$  lies close to  $m_P(z)$  which itself is approximatively equal to  $\tilde{m}(z)$  by Proposition C.5. Therefore, we expect  $\mathbb{E}[(A(z))_{ii}] = \mathbb{E}\left[\frac{d_i g_i}{1 + d_i g_i}\right]$  to be at short distance from  $\frac{d_i \tilde{m}(z)}{1 + d_i \tilde{m}(z)}$ .

In order to make rigorous this heuristic and to prove that  $\mathbb{E}[(A(z))_{ii}]$  is within  $\mathcal{O}(\frac{1}{P})$  distance to  $\frac{d_i \tilde{m}(z)}{1 + d_i \tilde{m}(z)}$ , we consider the first order Taylor approximation  $\mathbb{T}_{\tilde{m}(z)} h_i$  of the map  $h_i : g \mapsto \frac{1}{1 + d_i g}$  (as in the proof Proposition C.5 but this time centered at  $\tilde{m}(z)$ ). Using the fact that  $\frac{d_i t}{1 + d_i t} = 1 - \frac{1}{1 + d_i t} = 1 - h_i(t)$ , and inserting the Taylor approximation,  $\mathbb{E}[(A(z))_{ii}] - \frac{d_i \tilde{m}(z)}{1 + d_i \tilde{m}(z)}$  is equal to:

$$h_i(\tilde{m}(z)) - h_i(g_i(z)) = \frac{1}{1 + d_i \tilde{m}(z)} - \mathbb{E}[\mathbb{T}_{\tilde{m}(z)} h(g_i(z))] + \mathbb{E}[\mathbb{T}_{\tilde{m}(z)} h(g_i(z)) - h(g_i(z))].$$

Thus,

$$\left| \mathbb{E}[(A(z))_{ii}] - \frac{d_i \tilde{m}(z)}{1 + d_i \tilde{m}(z)} \right| \leq \left| \frac{1}{1 + d_i \tilde{m}(z)} - \mathbb{E}[\mathbb{T}_{\tilde{m}(z)} h(g_i(z))] \right| + \left| \mathbb{E}[\mathbb{T}_{\tilde{m}(z)} h(g_i(z)) - h(g_i(z))] \right|.$$

Using Lemma C.4 and Proposition C.5, the first term  $\left| \frac{1}{1 + d_i \tilde{m}(z)} - \mathbb{E}[\mathbb{T}_{\tilde{m}(z)} h(g_i(z))] \right| = \frac{d_i |\mathbb{E}[g_i(z)] - \tilde{m}(z)|}{|1 + d_i \tilde{m}(z)|^2}$  can be bounded by  $\frac{\delta}{P} \frac{d_i}{|1 + d_i \tilde{m}(z)|^2}$  where  $\delta$  depends on  $z, \gamma$  and  $\frac{1}{N} \text{Tr}(K)$  only. Since  $\text{Re}[\tilde{m}(z)] \geq 0$  thus  $|1 + d_i \tilde{m}(z)| \geq \max(1, |d_i \tilde{m}(z)|)$ , and  $|\tilde{m}(z)| \geq \frac{1}{|z| + \frac{1}{\gamma} \text{Tr}K}$  (Lemma C.6), the denominator can be lower bounded:

$$|1 + d_i \tilde{m}(z)|^2 \geq |d_i \tilde{m}(z)| \geq \frac{d_i}{|z| + \frac{1}{\gamma} \text{Tr}K},$$

yielding the upper bound:

$$\left| \frac{1}{1 + d_i \tilde{m}(z)} - \mathbb{E}[\mathbb{T}_{\tilde{m}(z)} h(g_i(z))] \right| \leq \frac{1}{P} \delta \left[ |z| + \frac{1}{\gamma} \text{Tr}K \right].$$

For the second term, using the same arguments as for the proof of Proposition C.5, we have:

$$\left| \mathbb{E}[\mathbb{T}_{\tilde{m}(z)} h(g_i(z)) - h(g_i(z))] \right| \leq \frac{\mathbb{E}\left[|\tilde{m}(z) - g_i(z)|^2\right]}{|\tilde{m}(z)|^2}.$$

Recall that  $|\tilde{m}(z)| \geq \frac{1}{|z| + \frac{1}{\gamma} \text{Tr}K}$  and that, by Lemma C.4 and Proposition C.2,  $\mathbb{E}\left[|\tilde{m}(z) - g_i(z)|^2\right] \leq \frac{\tilde{\delta}}{P}$  where  $\tilde{\delta}$  depends on  $z, \gamma$  and  $\frac{1}{N} \text{Tr}(K)$  only. This implies that

$$\left| \mathbb{E}[\mathbb{T}_{\tilde{m}(z)} h(g_i(z)) - h(g_i(z))] \right| \leq \frac{\tilde{\delta}}{P} \left[ |z| + \frac{1}{\gamma} \text{Tr}K \right]^2.$$



As a consequence, there exists a constant  $c$  which depends on  $z, \gamma$  and  $\frac{1}{N} \text{Tr}(K)$  only such that:

$$\left| \mathbb{E} [(A(z))_{ii}] - \frac{d_i \tilde{m}(z)}{1 + d_i \tilde{m}(z)} \right| \leq \frac{c}{P}.$$

Using the effective ridge  $\tilde{\lambda}(z) := \frac{1}{\tilde{m}(-z)}$ , the term  $\frac{d_i \tilde{m}(z)}{1 + d_i \tilde{m}(z)} = \frac{d_i}{d_i + \tilde{\lambda}(-z)}$  is equal to  $(K(K + \tilde{\lambda}I_N)^{-1})_{ii}$  since, in the basis considered,  $K(K + \tilde{\lambda}I_N)^{-1}$  is a diagonal matrix. Hence, we obtain:

$$\left\| \mathbb{E}[A(z)] - K(K + \tilde{\lambda}I_N)^{-1} \right\|_{op} \leq \frac{c}{P}$$

which allows us to conclude.  $\square$

Using the above proposition, we can bound the distance between the expected  $\lambda$ -RF predictor and the  $\tilde{\lambda}$ -RF predictor.

**Theorem C.8.** For  $N, P > 0$  and  $\lambda > 0$ , we have

$$\left| \mathbb{E}[f_{\lambda, \gamma}^{(RF)}(x)] - f_{\tilde{\lambda}}^{(K)}(x) \right| \leq \frac{c \sqrt{K(x, x)} \|y\|_{K^{-1}}}{P} \quad (10)$$

where the effective ridge  $\tilde{\lambda}(\lambda, \gamma) > \lambda$  is the unique positive number satisfying

$$\tilde{\lambda} = \lambda + \frac{\tilde{\lambda}}{\gamma} \frac{1}{N} \sum_{i=1}^N \frac{d_i}{\tilde{\lambda} + d_i}, \quad (11)$$

and where  $c > 0$  depends on  $\lambda, \gamma$ , and  $\frac{1}{N} \text{Tr}K(X, X)$  only.

*Proof.* Recall that  $\tilde{m}(-\lambda)$  is the unique non negative real such that  $\gamma = \frac{1}{N} \sum_{i=1}^N \frac{d_i \tilde{m}(-\lambda)}{1 + d_i \tilde{m}(-\lambda)} + \gamma \lambda \tilde{m}(-\lambda)$ . Dividing this equality by  $\gamma \tilde{m}(-\lambda)$  yields Equation (11). From now on, let  $\tilde{\lambda} = \tilde{\lambda}(\lambda, \gamma)$ .

We now bound the l.h.s. of Equation (10). By Proposition C.1, since  $\hat{y} = A(-\lambda)y$ , the average  $\lambda$ -RF predictor is  $\mathbb{E}[f_{\lambda, \gamma}^{(RF)}(x)] = K(x, X)K^{-1} \mathbb{E}[A(-\lambda)]y$ . The  $\tilde{\lambda}$ -KRR predictor is  $f_{\tilde{\lambda}}^{(K)}(x) = K(x, X) \left( K + \tilde{\lambda}I_N \right)^{-1} y$ . Thus:

$$\left| \mathbb{E}[f_{\lambda, \gamma}^{(RF)}(x)] - f_{\tilde{\lambda}}^{(K)}(x) \right| = \left| K(x, X)K^{-1} \left[ \mathbb{E}[A(-\lambda)] - K \left( K + \tilde{\lambda}I_N \right)^{-1} \right] y \right|.$$

The r.h.s. can be expressed as the absolute value of the scalar product  $|\langle w, v \rangle_{K^{-1}}| = |v^T K^{-1} w|$  where  $v = K(x, X)$  and  $w = [\mathbb{E}[A(-\lambda)] - K(K + \tilde{\lambda}I_N)^{-1}]y$ . By Cauchy-Schwarz inequality,  $|\langle v, w \rangle_{K^{-1}}| \leq \|v\|_{K^{-1}} \|w\|_{K^{-1}}$ .

For a general vector  $v$ , the  $K^{-1}$ -norm  $\|v\|_{K^{-1}}$  is equal to the norm minimum Hilbert norm (for the RKHS associated to the kernel  $K$ ) interpolating function:

$$\|v\|_{K^{-1}} = \min_{f \in \mathcal{H}, f(x_i) = v_i} \|f\|_{\mathcal{H}}.$$

Indeed the minimal interpolating function is the kernel regression given by  $f^{(K)}(\cdot) = K(\cdot, X)K(X, X)^{-1}v$  which has norm (writing  $\beta = K^{-1}v$ ):

$$\|f^{(K)}\|_{\mathcal{H}} = \left\| \sum_{i=1}^N \beta_i K(\cdot, x_i) \right\|_{\mathcal{H}} = \sqrt{\sum_{i,j=1}^N \beta_i \beta_j K(x_i, x_j)} = \sqrt{v^T K^{-1} K K^{-1} v} = \|v\|_{K^{-1}}.$$

We can now bound the two norms  $\|v\|_{K^{-1}}$  and  $\|w\|_{K^{-1}}$ . For  $v = K(x, X)$ , we have

$$\|v\|_{K^{-1}} = \min_{f \in \mathcal{H}, f(x_i) = v_i} \|f\|_{\mathcal{H}} \leq \|K(x, \cdot)\|_{\mathcal{H}} = K(x, x)^{\frac{1}{2}}. \quad (12)$$

since  $K(x, \cdot)$  is an interpolating function for  $v$ .

It remains to bound  $\|w\|_{K^{-1}}$ . Recall that  $K = UDU^T$  with  $D$  diagonal, and that, from the previous proposition,  $\mathbb{E}[A(-\lambda)] = UD_A U^T$  where  $D_A = \text{diag}\left(\frac{d_1 g_1(-\lambda)}{1+d_1 g_1(-\lambda)}, \dots, \frac{d_N g_N(-\lambda)}{1+d_N g_N(-\lambda)}\right)$ . The norm  $\|w\|_{K^{-1}}$  is equal to

$$\sqrt{\tilde{y}^T \left[ D_A - D \left( D + \tilde{\lambda}(\lambda) I_N \right)^{-1} \right]^T D^{-1} \left[ D_A - D \left( D + \tilde{\lambda}(\lambda) I_N \right)^{-1} \right] \tilde{y}},$$

where  $\tilde{y} = U^T y$ . Expanding the product,  $\|w\|_{K^{-1}} = \sqrt{\sum_{i=1}^N \frac{\tilde{y}_i^2}{d_i} \left( (D_A)_{ii} - \frac{d_i}{\tilde{\lambda}(\lambda) + d_i} \right)^2}$ , hence by Proposition C.7,  $\|w\|_{K^{-1}} \leq \frac{c}{P} \sqrt{\sum_{i=1}^N \frac{\tilde{y}_i^2}{d_i}}$ . The result follows from noticing that  $\sum_{i=1}^N \frac{\tilde{y}_i^2}{d_i} = \tilde{y}^T D^{-1} \tilde{y} = \|y\|_{K^{-1}}^2$ :

$$\left| \mathbb{E}[f_{\lambda, \gamma}^{(RF)}(x)] - f_{\tilde{\lambda}}^{(K)}(x) \right| \leq \|v\|_{K^{-1}} \|w\|_{K^{-1}} \leq \frac{cK(x, x)^{\frac{1}{2}} \|y\|_{K^{-1}}}{P},$$

which allows us to conclude.  $\square$

**Corollary C.9.** *If  $\mathbb{E}_{\mathcal{D}}[K(x, x)] < \infty$ , we have that the difference of errors  $\delta_E = \left| L(\mathbb{E}[f_{\lambda, \gamma}^{(RF)}]) - L(\hat{f}_{\tilde{\lambda}}^{(K)}) \right|$  is bounded from above by*

$$\delta_E \leq \frac{C\|y\|_{K^{-1}}}{P} \left( 2\sqrt{L(\hat{f}_{\tilde{\lambda}}^{(K)})} + \frac{C\|y\|_{K^{-1}}}{P} \right),$$

where  $C$  is given by  $c\sqrt{\mathbb{E}_{\mathcal{D}}[K(x, x)]}$ , with  $c$  the constant appearing in (10) above.

*Proof.* For any function  $f : \mathbb{R}^d \rightarrow \mathbb{R}$ , we denote by  $\|f\| = (\mathbb{E}_{\mathcal{D}}[f(x)^2])^{\frac{1}{2}}$  its  $L^2(\mathcal{D})$ -norm. Integrating  $\left| \mathbb{E}[f_{\lambda, \gamma}^{(RF)}(x)] - f_{\tilde{\lambda}}^{(K)}(x) \right|^2 \leq \frac{c^2 K(x, x) \|y\|_{K^{-1}}^2}{P^2}$  over  $x \sim \mathcal{D}$ , we get the following bound:

$$\|\mathbb{E}[f_{\lambda, \gamma}^{(RF)}] - f_{\tilde{\lambda}}^{(K)}\| \leq \frac{c[\mathbb{E}_{\mathcal{D}}[K(x, x)]]^{\frac{1}{2}} \|y\|_{K^{-1}}}{P}.$$

Hence, if  $f^*$  is the true function, by the triangular inequality,

$$\left| \|\mathbb{E}[f_{\lambda, \gamma}^{(RF)}] - f^*\| - \|f_{\tilde{\lambda}}^{(K)} - f^*\| \right| \leq \frac{c[\mathbb{E}_{\mathcal{D}}[K(x, x)]]^{\frac{1}{2}} \|y\|_{K^{-1}}}{P}.$$

Notice that  $L(\mathbb{E}[f_{\gamma, \lambda}^{(RF)}]) = \|\mathbb{E}[f_{\gamma, \lambda}^{(RF)}] - f^*\|^2$  and  $L(\hat{f}_{\tilde{\lambda}}^{(K)}) = \|f_{\tilde{\lambda}}^{(K)} - f^*\|^2$ . Since  $|a^2 - b^2| \leq |a - b|(|a - b| + 2|b|)$ , we obtain

$$\left| L(\mathbb{E}[f_{\gamma, \lambda}^{(RF)}]) - L(\hat{f}_{\tilde{\lambda}}^{(K)}) \right| \leq \frac{c[\mathbb{E}_{\mathcal{D}}[K(x, x)]]^{\frac{1}{2}} \|y\|_{K^{-1}}}{P} \left( 2\sqrt{L(\hat{f}_{\tilde{\lambda}}^{(K)})} + \frac{c[\mathbb{E}_{\mathcal{D}}[K(x, x)]]^{\frac{1}{2}} \|y\|_{K^{-1}}}{P} \right),$$

which allows us to conclude.  $\square$

### C.3.2. PROPERTIES OF THE EFFECTIVE RIDGE

Thanks to the implicit definition of the effective ridge  $\tilde{\lambda}$ , we obtain the following:

**Proposition C.10.** *The effective ridge  $\tilde{\lambda}$  satisfies the following properties:*

1. for any  $\gamma > 0$ , we have  $\lambda < \tilde{\lambda}(\lambda, \gamma) \leq \lambda + \frac{1}{\gamma}T$ ;
2. the function  $\gamma \mapsto \tilde{\lambda}(\lambda, \gamma)$  is decreasing;
3. for  $\gamma > 1$ , we have  $\tilde{\lambda} \leq \frac{\gamma}{\gamma-1}\lambda$ ;
4. for  $\gamma < 1$ , we have  $\tilde{\lambda} \geq \frac{1-\sqrt{\gamma}}{\sqrt{\gamma}} \min_i d_i$ .

*Proof.* (1) The upper bound in the first statement follows directly from Lemma C.6 where it was shown that  $\tilde{m}(-\lambda) \geq \frac{1}{\lambda + \frac{1}{\gamma} \frac{1}{N} \text{Tr} K}$  and from the fact that  $\tilde{\lambda}(\lambda, \gamma) = \frac{1}{\tilde{m}(-\lambda)}$ . For the lower bound, remark that Equation (11) can be written as:

$$\tilde{\lambda}(\lambda, \gamma) = \lambda + \frac{1}{\gamma} \frac{1}{N} \text{Tr}[\tilde{\lambda}(\lambda, \gamma) K (\tilde{\lambda}(\lambda, \gamma) I_N + K)^{-1}].$$

Since  $\tilde{\lambda}(\lambda, \gamma) \geq 0$  and  $K$  is a positive symmetric matrix,  $\text{Tr}[K[\tilde{\lambda}(\lambda, \gamma) I_N + K]^{-1}] \geq 0$ : this yields  $\tilde{\lambda}(\lambda, \gamma) \geq \lambda$ .

(2) We show that  $\gamma \mapsto \tilde{\lambda}(\lambda, \gamma)$  is decreasing by computing the derivative of the effective ridge with respect to  $\gamma$ . Differentiating both sides of Equation (11),  $\partial_\gamma \tilde{\lambda} = \partial_\gamma \left[ \lambda + \frac{\tilde{\lambda}}{\gamma} \frac{1}{N} \sum_{i=1}^N \frac{d_i}{\tilde{\lambda} + d_i} \right]$ . The r.h.s. is equal to:

$$\frac{\partial_\gamma \tilde{\lambda}}{\gamma} \frac{1}{N} \sum_{i=1}^N \frac{d_i}{\tilde{\lambda} + d_i} - \frac{\tilde{\lambda}}{\gamma^2} \frac{1}{N} \sum_{i=1}^N \frac{d_i}{\tilde{\lambda} + d_i} - \frac{\tilde{\lambda}}{\gamma} \frac{1}{N} \sum_{i=1}^N \frac{d_i \partial_\gamma \tilde{\lambda}}{(\tilde{\lambda} + d_i)^2}.$$

Using Equation (11),  $\frac{1}{\gamma} \frac{1}{N} \sum_{i=1}^N \frac{d_i}{\tilde{\lambda} + d_i} = \frac{\tilde{\lambda} - \lambda}{\tilde{\lambda}}$  and thus:

$$\partial_\gamma \tilde{\lambda} \left[ \frac{\lambda}{\tilde{\lambda}} + \frac{\tilde{\lambda}}{\gamma} \frac{1}{N} \sum_{i=1}^N \frac{d_i}{(\tilde{\lambda} + d_i)^2} \right] = -\frac{\tilde{\lambda} - \lambda}{\gamma}.$$

Since  $\tilde{\lambda} \geq \lambda \geq 0$ , the derivative of the effective ridge with respect to  $\gamma$  is negative: the function  $\gamma \mapsto \tilde{\lambda}(\lambda, \gamma)$  is decreasing.

(3) Using the bound  $\frac{d_i}{\tilde{\lambda} + d_i} \leq 1$  in Equation (11), we obtain  $\tilde{\lambda} \leq \lambda + \frac{\tilde{\lambda}}{\gamma}$  which, when  $\gamma \geq 1$ , implies that  $\tilde{\lambda} \leq \lambda \frac{\gamma}{\gamma-1}$ .

(4) Recall that  $\lambda > 0$  and that the effective ridge  $\tilde{\lambda}$  is the unique fixpoint of the map  $f(t) = \lambda + \frac{t}{\gamma} \frac{1}{N} \sum_{i=1}^N \frac{d_i}{t + d_i}$  in  $\mathbb{R}_+$ . The map is concave and, at  $t = 0$ , we have  $f(t) = \lambda > 0 = t$ : this implies that  $f'(\tilde{\lambda}) < 1$  otherwise by concavity, for any  $t \leq \tilde{\lambda}$  one would have  $f(t) \leq t$ . The derivative of  $f$  is  $f'(t) = \frac{1}{\gamma} \frac{1}{N} \sum_{i=1}^N \frac{d_i^2}{(t + d_i)^2}$ , thus  $\frac{1}{\gamma} \frac{1}{N} \sum_{i=1}^N \frac{d_i^2}{(\tilde{\lambda} + d_i)^2} < 1$ . Using the fact that  $d_0$  is the smallest eigenvalue of  $K(X, X)$ , i.e.  $d_i \geq d_0$ , we get  $1 > \frac{1}{\gamma} \frac{d_0^2}{(\tilde{\lambda} + d_0)^2}$  hence  $\tilde{\lambda} \geq d_0 \frac{1 - \sqrt{\gamma}}{\sqrt{\gamma}}$ .  $\square$

Similarly, we gather a number of properties of the derivative  $\partial_\lambda \tilde{\lambda}(\lambda, \gamma)$ .

**Proposition C.11.** *For  $\gamma > 1$ , as  $\lambda \rightarrow 0$ , the derivative  $\partial_\lambda \tilde{\lambda}$  converges to  $\frac{\gamma}{\gamma-1}$ . As  $\lambda \gamma \rightarrow \infty$ , we have  $\partial_\lambda \tilde{\lambda}(\lambda, \gamma) \rightarrow 1$ .*

*Proof.* Differentiating both sides of Equation (11),

$$\partial_\lambda \tilde{\lambda} = 1 + \partial_\lambda \tilde{\lambda} \frac{1}{\gamma} \frac{1}{N} \sum_{i=1}^N \frac{d_i}{\tilde{\lambda} + d_i} - \tilde{\lambda} \partial_\lambda \tilde{\lambda} \frac{1}{\gamma} \frac{1}{N} \sum_{i=1}^N \frac{d_i}{(\tilde{\lambda} + d_i)^2}.$$

Hence the derivative  $\partial_\lambda \tilde{\lambda}$  satisfies the following equality

$$\partial_\lambda \tilde{\lambda} \left( 1 - \frac{1}{\gamma} \frac{1}{N} \sum_{i=1}^N \frac{d_i}{\tilde{\lambda} + d_i} + \tilde{\lambda} \frac{1}{\gamma} \frac{1}{N} \sum_{i=1}^N \frac{d_i}{(\tilde{\lambda} + d_i)^2} \right) = 1. \quad (13)$$

(1) Assuming  $\gamma > 1$ , from the point 3. of Proposition C.10, we already know that  $\tilde{\lambda}(\lambda, \gamma) \leq \lambda \frac{\gamma}{\gamma-1}$  hence  $\tilde{\lambda}(0, \gamma) = 0$ . Actually, using similar arguments as in the proof of point 3., this holds also for  $\gamma = 1$ . Using the fact that  $\tilde{\lambda}(0, \gamma) = 0$ , we get  $\partial_\lambda \tilde{\lambda}(0, \gamma) = 1 + \frac{\partial_\lambda \tilde{\lambda}(0, \gamma)}{\gamma}$ , hence  $\partial_\lambda \tilde{\lambda}(0, \gamma) = \frac{\gamma}{\gamma-1}$ .

(2) From the first point of Proposition C.10,  $\tilde{\lambda} \sim \lambda$  as  $\lambda \gamma \rightarrow \infty$ . Since Equation (13) can be expressed as:

$$\partial_\lambda \tilde{\lambda} \left( 1 - \frac{1}{\gamma \lambda} \frac{1}{N} \sum_{i=1}^N \frac{d_i}{\frac{\tilde{\lambda}}{\lambda} + d_i} + \frac{1}{\gamma \lambda} \frac{\tilde{\lambda}}{\lambda} \frac{1}{N} \sum_{i=1}^N \frac{d_i}{(\frac{\tilde{\lambda}}{\lambda} + d_i)^2} \right) = 1,$$

we obtain that  $\partial_\lambda \tilde{\lambda} \rightarrow 1$  as  $\lambda \rightarrow \infty$ .  $\square$

## C.3.3. VARIANCE OF THE PREDICTOR

By the bias-variance decomposition, in order to bound the difference between  $\mathbb{E}[L(\hat{f}_{\gamma,\lambda}^{(RF)})]$  and  $L(\hat{f}_{\tilde{\lambda}}^{(K)})$ , we have to bound  $\mathbb{E}_{\mathcal{D}}[\text{Var}(f(x))]$ . The law of total variance yields  $\text{Var}(\hat{f}(x)) = \text{Var}(\mathbb{E}[\hat{f}(x)|F]) + \mathbb{E}[\text{Var}[\hat{f}(x)|F]]$ . By Proposition C.1, we have  $\mathbb{E}[\hat{f}(x)|F] = K(x, X)K(X, X)^{-1}\hat{y}$  and  $\text{Var}[\hat{f}(x)|F] = \frac{1}{P}\|\hat{\theta}\|^2\tilde{K}(x, x)$ . Hence, it remains to study  $\text{Var}(K(x, X)K(X, X)^{-1}\hat{y})$  and  $\mathbb{E}[\|\hat{\theta}\|^2]$ . Recall that we denote  $T = \frac{1}{N}\text{Tr}K(X, X)$ .

This section is dedicated to the proof of the variance bound of Theorem 5.1 of the paper:

**Theorem 5.1** *There are constants  $c_1, c_2 > 0$  depending on  $\lambda, \gamma, T$  only such that*

$$\begin{aligned} \text{Var}(K(x, X)K(X, X)^{-1}\hat{y}) &\leq \frac{c_1 K(x, x)\|y\|_{K^{-1}}^2}{P} \\ \left| \mathbb{E}[\|\hat{\theta}\|^2] - \partial_{\lambda}\tilde{\lambda}y^T M_{\tilde{\lambda}}y \right| &\leq \frac{c_2\|y\|_{K^{-1}}^2}{P}, \end{aligned}$$

where  $\partial_{\lambda}\tilde{\lambda}$  is the derivative of  $\tilde{\lambda}$  with respect to  $\lambda$  and for  $M_{\tilde{\lambda}} = K(X, X)(K(X, X) + \tilde{\lambda}I_N)^{-2}$ . As a result

$$\text{Var}\left(\hat{f}_{\tilde{\lambda}}^{(RF)}(x)\right) \leq \frac{c_3 K(x, x)\|y\|_{K^{-1}}^2}{P},$$

where  $c_3 > 0$  depends on  $\lambda, \gamma, T$ .

• **Bound on  $\text{Var}(K(x, X)K(X, X)^{-1}\hat{y})$ .** We first study the covariance of the entries of the matrix

$$A_{\lambda} = \frac{1}{P}K^{\frac{1}{2}}W^T \left( \frac{1}{P}WKW^T + \lambda I_P \right)^{-1} WK^{\frac{1}{2}},$$

where  $K = \text{diag}(d_1, \dots, d_N)$  is a positive definite diagonal matrix and  $W$  is a  $P \times N$  matrix with i.i.d. Gaussian entries. In the next proposition we show a  $\frac{c'_1}{P}$  bound for the covariance of the entries of  $A_{\lambda}$ , then we exploit this result in order to prove the bound on the variance of  $K(x, X)K(X, X)^{-1}\hat{y}$ .

**Proposition C.12.** *There exists a constant  $c'_1 > 0$  depending on  $\lambda, \gamma$ , and  $\frac{1}{N}\text{Tr}(K)$  only, such that the following bounds hold:*

$$\begin{aligned} |\text{Cov}((A_{\lambda})_{ii}, (A_{\lambda})_{jj})| &\leq \frac{c'_1}{P} \\ \text{Var}((A_{\lambda})_{ij}) &\leq \min\left\{\frac{d_i}{d_j}, \frac{d_j}{d_i}\right\} \frac{c'_1}{P}. \end{aligned}$$

For all other cases (i.e. if  $i, j, k$  and  $l$  take more than two different values),  $\text{Cov}((A_{\lambda})_{ij}, (A_{\lambda})_{kl}) = 0$ .

*Proof.* We want to study the covariances  $\text{Cov}((A_{\lambda})_{ij}, (A_{\lambda})_{kl})$  for any  $i, j, k, l$ . Using the same symmetry argument as in the proof of Proposition C.7,  $\mathbb{E}[(A_{\lambda})_{ij}(A_{\lambda})_{kl}] = 0$  whenever each value in  $\{i, j, k, l\}$  does not appear an even number of times in  $(i, j, k, l)$ . Using the fact that  $A_{\lambda}$  is symmetric, it remains to study  $\text{Cov}((A_{\lambda})_{ii}, (A_{\lambda})_{jj})$ ,  $\text{Var}((A_{\lambda})_{ii})$  and  $\text{Var}[(A_{\lambda})_{ij}]$  for all  $i \neq j$ . By the Cauchy-Schwarz inequality, any bound on  $\text{Var}((A_{\lambda})_{ii})$  will imply a similar bound on  $\text{Cov}((A_{\lambda})_{ii}, (A_{\lambda})_{jj})$ . Besides, as we have seen in the proof of Proposition C.7,  $\mathbb{E}[(A_{\lambda})_{ij}] = 0$  for any  $i \neq j$ . Thus, we only have to study  $\text{Var}((A_{\lambda})_{ii})$  and  $\mathbb{E}[(A_{\lambda})_{ij}^2]$ .

• **Bound on  $\text{Var}((A_{\lambda})_{ii})$ :** From Equation (9),

$$\text{Var}((A_{\lambda})_{ii}) = \text{Var}\left(\frac{d_i g_i}{1 + d_i g_i}\right) = \text{Var}\left(1 - \frac{1}{1 + d_i g_i}\right) = \text{Var}\left(\frac{1}{1 + d_i g_i}\right) \leq \mathbb{E}\left[\left(\frac{1}{1 + d_i g_i} - \frac{1}{1 + d_i \tilde{m}}\right)^2\right],$$

where  $g_i := g_i(-\lambda)$ . Again, we use the first order Taylor approximation  $\text{Th}$  of  $h : x \rightarrow \frac{1}{1+d_i x}$  centered at  $\tilde{m} := \tilde{m}(-\lambda)$ , as

well as the bound (7), to obtain

$$\begin{aligned} \mathbb{E} \left[ \left( \frac{1}{1+d_i g_i} - \frac{1}{1+d_i \tilde{m}} \right)^2 \right] &= \mathbb{E} \left[ \left( -\frac{d_i}{(1+d_i \tilde{m})^2} (g_i - \tilde{m}) + h(g_i) - \text{Th}(g_i) \right)^2 \right] \\ &\leq \frac{2d_i^2}{(1+d_i \tilde{m})^4} \mathbb{E} \left[ (g_i - \tilde{m})^2 \right] + 2\mathbb{E} \left[ (h(g_i) - \text{Th}(g_i))^2 \right] \\ &\leq \frac{2}{6\tilde{m}^2} \mathbb{E} \left[ (g_i - \tilde{m})^2 \right] + \frac{2}{\tilde{m}^4} \mathbb{E} \left[ (g_i - \tilde{m})^4 \right]. \end{aligned}$$

Using Lemma C.4, we get  $\text{Var}((A_\lambda)_{ii}) \leq \frac{c'_1}{P}$ , where  $c'_1 > 0$  depends on  $\lambda, \gamma$ , and  $\frac{1}{N} \text{Tr}(K)$  only.

• Bound on  $\mathbb{E}((A_\lambda)_{ij})$  for  $i \neq j$ : Following the same arguments as for Equation (9),  $(A_\lambda)_{ij}$  is equal to

$$(A_\lambda)_{ij} = \frac{\sqrt{d_i d_j}}{P} \left[ w_i^T B_{(i)}^{-1} w_j - \frac{d_i g_i}{1+d_i g_i} w_i^T B_{(i)}^{-1} w_j \right] = \frac{\sqrt{d_i d_j}}{1+d_i g_i} \frac{1}{P} w_i^T B_{(i)}^{-1} w_j,$$

where we set  $B_{(i)} := B_i(-\lambda)$ . Since  $w_i$  and  $B_{(i)}$  are independent,  $\mathbb{E} \left[ \left( w_i^T B_{(i)}^{-1} w_j \right)^2 \right] = \mathbb{E} \left[ w_j^T B_{(i)}^{-2} w_j \right]$ , and thus, by the Cauchy-Schwarz inequality, we have

$$\mathbb{E} \left[ (A_\lambda)_{ij}^2 \right] \leq \frac{1}{P^2} \sqrt{\mathbb{E} \left[ \frac{d_i^2 d_j^2}{(1+d_i g_i)^4} \right]} \sqrt{\mathbb{E} \left[ \left( w_j^T B_{(i)}^{-2} w_j \right)^2 \right]}. \quad (14)$$

Recall that  $\tilde{m} := \tilde{m}(-\lambda)$ . Using the fact that  $\frac{1}{1+d_i g_i} = \frac{1}{1+d_i \tilde{m}} + \frac{1}{1+d_i g_i} - \frac{1}{1+d_i \tilde{m}}$  and inserting the first Taylor approximation  $\text{Th}$  of  $h : x \rightarrow \frac{1}{1+d_i x}$  centered at  $\tilde{m}$ , we get:

$$\mathbb{E} \left[ \left( \frac{1}{1+d_i g_i} \right)^4 \right] = \mathbb{E} \left[ \left( \frac{1}{1+d_i \tilde{m}} - \frac{d_i}{(1+d_i \tilde{m})^2} (g_i - \tilde{m}) + h(g_i) - \text{Th}(g_i) \right)^4 \right].$$

Using a convexity argument, the bound (7), and the lower bound on  $\tilde{m}$  given by Lemma C.6, there exists three constants  $\tilde{c}_1, \tilde{c}_2, \tilde{c}_3$ , which depend on  $\lambda, \gamma$  and  $\frac{1}{N} \text{Tr}(K)$  only, such that  $\mathbb{E} \left[ \left( \frac{1}{1+d_i g_i} \right)^4 \right]$  is bounded by

$$\frac{\tilde{c}_1}{(1+d_i \tilde{m})^4} + \frac{\tilde{c}_2 d_i^4}{(1+d_i \tilde{m})^8} \mathbb{E} \left[ (g_i - \tilde{m})^4 \right] + \tilde{c}_3 \mathbb{E} \left[ (g_i - \tilde{m})^8 \right].$$

Thanks to Lemma C.4 and Proposition C.5, this last expression can be bounded by an expression of the form  $\frac{\tilde{e}_1}{d_i^4} + \frac{\tilde{e}_2}{P^2 d_i^4} + \frac{\tilde{e}_3}{P^4}$ .

Note that  $\frac{\tilde{e}_2}{P^2 d_i^4} \leq \frac{\tilde{e}_2}{d_i^4}$  and  $\frac{\tilde{e}_3}{P^4} \leq \frac{\tilde{e}_3}{\gamma^4} \left( \frac{1}{N} \text{Tr}(K) \right)^4$ . Hence, we obtain the bound:

$$\mathbb{E} \left[ \left( \frac{1}{1+d_i g_i} \right)^4 \right] \leq \frac{\tilde{c}}{d_i^4},$$

where  $\tilde{c} = \tilde{e}_1 + \tilde{e}_2 + \frac{\tilde{e}_3 (\frac{1}{N} \text{Tr}(K))^4}{\gamma^4}$  depends on  $\lambda, \gamma$  and  $\frac{1}{N} \text{Tr}(K)$  only.

Let us now consider the second term in the r.h.s. of (14). Using the fact that  $\|B_{(i)}\|_{op} \geq \frac{1}{\lambda}$ , we get

$$\sqrt{\mathbb{E} \left[ \left( w_j^T B_{(i)}^{-2} w_j \right)^2 \right]} \leq \sqrt{\frac{1}{\lambda^4} \mathbb{E} \left[ \left( w_j^T w_j \right)^2 \right]} = \sqrt{\frac{1}{\lambda^4} N(N+2)} \leq \frac{N+1}{\lambda^2},$$

where we have used the fact that the second moment of a  $\chi^2(N)$  distribution is  $N(N+2)$ . Together, we obtain

$$\begin{aligned}\mathbb{E}[(A)_{ij}^2] &\leq \frac{1}{P^2} \sqrt{\mathbb{E}\left[\frac{d_i^2 d_j^2}{(1+d_i g_i)^4}\right]} \sqrt{\mathbb{E}\left[\left(w_j^T B_{(i)}^{-2} w_j\right)^2\right]} \\ &\leq \frac{\tilde{c} d_i d_j}{d_i^2} \frac{N+1}{P^2 \lambda^2} \\ &\leq \frac{\tilde{c} d_j}{P d_i \lambda^2 \gamma} \frac{N+1}{N} \leq \frac{c'_1}{P} \frac{d_i}{d_j},\end{aligned}$$

for  $c'_1 = 2 \frac{\tilde{c}}{\lambda^2 \gamma}$ . Since the matrix  $A_\lambda$  is symmetric, we finally conclude that

$$\mathbb{E}[(A_\lambda)_{ij}^2] \leq \frac{c'_1}{P} \min\left\{\frac{d_i}{d_j}, \frac{d_j}{d_i}\right\}.$$

Note that  $c'_1$  is a constant related to the bounds constructed in Lemma C.2 and Proposition C.5 and as such it depends on  $\frac{1}{N} \text{Tr}(K)$ ,  $\gamma$  and  $\lambda$  only.  $\square$

**Proposition C.13.** *There exists a constant  $c_1 > 0$  (depending on  $\lambda, \gamma, T$  only) such that the variance of the estimator is bounded by*

$$\text{Var}(K(x, X)K(X, X)^{-1}\hat{y}) \leq \frac{c_1 \|y\|_{K^{-1}}^2 K(x, x)}{P}.$$

*Proof.* As in the proof of Theorem C.8, with the right change of basis, we may assume the Gram matrix  $K(X, X)$  to be diagonal.

We first express the covariances of  $\hat{y} = A(-\lambda)y$ . Using Proposition Proposition C.12, for  $i \neq j$  we have

$$\text{Cov}(\hat{y}_i, \hat{y}_j) = \sum_{k,l=1}^N \text{Cov}((A_\lambda)_{ik}, (A_\lambda)_{lj}) y_k y_l = \text{Cov}((A_\lambda)_{ii}, (A_\lambda)_{jj}) y_i y_j + \mathbb{E}[(A_\lambda)_{ij}^2] y_j y_i,$$

whereas for  $i = j$  we have

$$\text{Cov}(\hat{y}_i, \hat{y}_i) = \sum_{k=1}^N \text{Cov}((A_\lambda)_{ik}, (A_\lambda)_{ki}) y_k^2 = \text{Var}((A_\lambda)_{ii}) y_i^2 + \sum_{k \neq i} \mathbb{E}[(A_\lambda)_{ik}^2] y_k^2.$$

We decompose  $K^{-\frac{1}{2}} \text{Cov}(\hat{y}, \hat{y}) K^{-\frac{1}{2}}$  into two terms: let  $C$  be the matrix of entries

$$C_{ij} = \frac{\text{Cov}((A_\lambda)_{ii}, (A_\lambda)_{jj}) + \delta_{i \neq j} \mathbb{E}[(A_\lambda)_{ij}^2]}{\sqrt{d_i d_j}} y_i y_j,$$

and let  $D$  the diagonal matrix with entries

$$D_{ii} = \frac{\sum_{k \neq i} \mathbb{E}[(A_\lambda)_{ik}^2] y_k^2}{d_i}.$$

We have the decomposition  $K^{-\frac{1}{2}} \text{Cov}(\hat{y}, \hat{y}) K^{-\frac{1}{2}} = C + D$ .

Proposition C.12 asserts that  $\text{Cov}((A_\lambda)_{ii}, (A_\lambda)_{jj}) \leq \frac{c'_1}{P}$  and  $\mathbb{E}[(A_\lambda)_{ij}^2] \leq \frac{c'_1}{P}$ , and thus the operator norm of  $C$  is bounded by

$$\begin{aligned}\|C\|_{op} &\leq \|C\|_F \\ &= \sqrt{\sum_{i,j} \frac{(\text{Cov}((A_\lambda)_{ii}, (A_\lambda)_{jj}) + \delta_{i \neq j} \mathbb{E}[(A_\lambda)_{ij}^2])^2}{d_i d_j} y_i^2 y_j^2} \\ &\leq \frac{2c'_1}{P} \sqrt{\sum_{ij} \frac{1}{d_i d_j} y_i^2 y_j^2} = \frac{2c'_1 \|y\|_{K^{-1}}^2}{P}\end{aligned}$$

For the matrix  $D$ , we use the bound  $\mathbb{E} [(A_\lambda)_{ik}^2] \leq \frac{c'_1}{P} \frac{d_i}{d_k}$  to obtain

$$D_{ii} = \frac{\sum_{k \neq i} \mathbb{E} [(A_\lambda)_{ik}^2] y_k^2}{d_i} \leq \frac{c'_1}{P} \sum_{k \neq i} \frac{y_k^2}{d_k} \leq \frac{c'_1 \|y\|_{K^{-1}}^2}{P},$$

which implies that  $\|D\|_{op} \leq \frac{c'_1 \|y\|_{K^{-1}}^2}{P}$ . As a result

$$\begin{aligned} \text{Var} (K(x, X)K^{-1}\hat{y}) &= K(x, X)K^{-1} \text{Cov}(\hat{y}, \hat{y})K^{-1}K(X, x) \\ &\leq K(x, X)K^{-\frac{1}{2}} \|C + D\|_{op} K^{-\frac{1}{2}} K(X, x) \\ &\leq \frac{3c'_1 \|y\|_{K^{-1}}^2}{P} \|K(x, X)\|_{K^{-1}}^2 \\ &\leq \frac{3c'_1 K(x, x) \|y\|_{K^{-1}}^2}{P}, \end{aligned}$$

where we used Inequality (12). This yields the result with  $c_1 = 3c'_1$ .  $\square$

• **Bound on  $\mathbb{E}_\pi [\|\hat{\theta}\|^2]$ .** To understand the variance of the  $\lambda$ -RF estimator  $\hat{f}_\lambda^{(RF)}$ , we need to describe the distribution of the squared norm of the parameters:

**Proposition C.14.** *For  $\gamma, \lambda > 0$  there exists a constant  $c_2 > 0$  depending on  $\lambda, \gamma, T$  only such that*

$$\left| \mathbb{E}[\|\hat{\theta}\|^2] - \partial_\lambda \tilde{\lambda} y^T K(X, X) \left( K(X, X) + \tilde{\lambda} I_N \right)^{-2} y \right| \leq \frac{c_2 \|y\|_{K^{-1}}^2}{P}. \quad (15)$$

*Proof.* As in the proof of Theorem C.8, with the right change of basis, we may assume the Gram matrix  $K(X, X)$  to be diagonal. Recall that  $\hat{\theta} = \frac{1}{\sqrt{P}} \left( \frac{1}{P} W K(X, X) W^T + \lambda I_N \right)^{-1} W K(X, X)^{\frac{1}{2}} y$ , thus we have:

$$\|\hat{\theta}\|^2 = \frac{1}{P} y^T K(X, X)^{\frac{1}{2}} W^T \left( \frac{1}{P} W K(X, X) W^T + \lambda I_P \right)^{-2} W K(X, X)^{\frac{1}{2}} y = y^T A'(-\lambda) y, \quad (16)$$

where  $A'(-\lambda)$  is the derivative of

$$A(z) = \frac{1}{P} K(X, X)^{\frac{1}{2}} W^T \left( \frac{1}{P} W K(X, X) W^T - z I_P \right)^{-1} W K(X, X)^{\frac{1}{2}}$$

with respect to  $z$  evaluated at  $-\lambda$ . Let

$$\tilde{A}(z) = K(X, X)(K(X, X) + \tilde{\lambda}(-z)I_N)^{-1}.$$

Remark that the derivative of  $\tilde{A}(z)$  is given by  $\tilde{A}'(z) = \tilde{\lambda}'(-z)K(X, X)(K(X, X) + \tilde{\lambda}(-z)I_N)^{-2}$ . Thus, from Equation (16), the l.h.s. of (15) is equal to:

$$\left| y^T \left( \mathbb{E}[A'(-\lambda)] - \tilde{A}'(-\lambda) \right) y \right|. \quad (17)$$

Using a classical complex analysis argument, we will show that  $\mathbb{E}[A'(-\lambda)]$  is close to  $\tilde{A}'(-\lambda)$  by proving a bound of the difference between  $\mathbb{E}[A(z)]$  and  $\tilde{A}(z)$  for any  $z \in \mathbb{H}_{<0}$ .

Note that the proof of Proposition C.7 provides a bound on the diagonal entries of  $\mathbb{E}[A(z)]$ , namely that for any  $z \in \mathbb{H}_{<0}$ ,

$$\left| \mathbb{E}[(A(z))_{ii}] - (\tilde{A}(z))_{ii} \right| \leq \frac{c}{P},$$

where  $\hat{c}$  depends on  $z, \gamma$  and  $T$  only. Actually, in order to prove (15), we will derive the following slightly different bound: for any  $z \in \mathbb{H}_{<0}$ ,

$$\left| \mathbb{E}[(A(z))_{ii}] - (\tilde{A}(z))_{ii} \right| \leq \frac{\hat{c}}{d_i P}, \quad (18)$$

where  $\hat{c}$  depends on  $z$ ,  $\gamma$  and  $T$  only. Let  $g_i := g_i(z)$  and  $\tilde{m} := \tilde{m}(z)$ . Recall that for  $h_i : x \mapsto \frac{d_i x}{1+d_i x}$ , one has  $(A(z))_{ii} = h_i(g_i)$ ,  $(\tilde{A}(z))_{ii} = h_i(\tilde{m})$  and

$$\begin{aligned} \mathbb{T}_{\tilde{m}} h_i(g_i) &= \frac{d_i \tilde{m}}{1+d_i \tilde{m}} - \frac{d_i (g_i - \tilde{m})}{(1+d_i \tilde{m})^2}, \\ h_i(g_i) - \mathbb{T}_{\tilde{m}} h_i(g_i) &= \frac{d_i^2 (g_i - \tilde{m})^2}{(1+d_i g_i)(1+d_i \tilde{m})^2}, \end{aligned}$$

where  $\mathbb{T}_{\tilde{m}} h_i$  is the first order Taylor approximation of  $h_i$  centered at  $\tilde{m}$ . Using this first order Taylor approximation, we can bound the difference  $|\mathbb{E}[h_i(g_i)] - h_i(\tilde{m})|$ :

$$\begin{aligned} |\mathbb{E}[h_i(g_i)] - h_i(\tilde{m})| &\leq \frac{d_i |\mathbb{E}[g_i] - \tilde{m}|}{(1+d_i \tilde{m})^2} + \frac{d_i^2}{(1+d_i \tilde{m})^2} \mathbb{E} \left[ \frac{|g_i - \tilde{m}|^2}{1+d_i g_i} \right] \\ &\leq \frac{\mathbf{a}}{d_i P} + \mathbf{a} \sqrt{\mathbb{E} \left[ \frac{1}{(1+d_i g_i)^2} \right]} \mathbb{E} \left[ |g_i - \tilde{m}|^4 \right], \end{aligned}$$

where  $\mathbf{a}$  depends on  $z$ ,  $\gamma$  and  $T$ . We need to bound  $\mathbb{E} \left[ \frac{1}{(1+d_i g_i)^2} \right]$ . Recall that in the proof of Proposition C.12, we bounded  $\mathbb{E} \left[ \frac{1}{(1+d_i g_i)^4} \right]$ . Using similar arguments, one shows that

$$\mathbb{E} \left[ \frac{1}{(1+d_i g_i)^2} \right] \leq \frac{\hat{e}^2}{d_i^2},$$

where  $\hat{e}$  depends on  $z$ ,  $\gamma$  and  $\frac{1}{N} \text{Tr}(K(X, X))$  only. The term  $\mathbb{E} \left[ |g_i - \tilde{m}|^4 \right]$  is bounded using Lemmas C.4, C.2 and Proposition C.5. This allows us to conclude that:

$$|\mathbb{E}[h_i(g_i)] - h_i(\tilde{m})| \leq \frac{\hat{c}}{d_i P},$$

where  $\hat{c}$  depends on  $z$ ,  $\gamma$  and  $\frac{1}{N} \text{Tr}(K(X, X))$  only, hence we obtain the Inequality (18).

We can now prove Inequality 15. We bound the difference of the derivatives of the diagonal terms of  $A(z)$  and  $\tilde{A}(z)$  by means of Cauchy formula. Consider a simple closed path  $\phi : [0, 1] \rightarrow \mathbb{H}_{<0}$  which surrounds  $z$ . Since

$$\mathbb{E}[(A'(z))_{ii}] - (\tilde{A}'(z))_{ii} = \frac{1}{2\pi i} \oint_{\phi} \frac{\mathbb{E}[(A(z))_{ii}] - (\tilde{A}(z))_{ii}}{(w-z)^2} dw,$$

using the bound (18), we have:

$$\left| \mathbb{E}[(A'(z))_{ii}] - (\tilde{A}'(z))_{ii} \right| \leq \frac{\hat{c}}{d_i P} \frac{1}{2\pi} \oint_{\phi} \frac{1}{|w-z|^2} dw \leq \frac{c_2}{d_i P},$$

where  $c_2$  depends on  $z$ ,  $\gamma$ , and  $T$  only. This allows one to bound the operator norm of  $K(X, X)(\mathbb{E}[A'(z)] - \tilde{A}'(z))$ :

$$\|K(X, X)(\mathbb{E}[A'(z)] - \tilde{A}'(z))\|_{op} \leq \frac{c_2}{P}.$$

Using this bound and (17), we have

$$\left| \mathbb{E}[\|\hat{\theta}\|^2] - \partial_{\lambda} \tilde{\lambda} y^T K(X, X) \left( K(X, X) + \tilde{\lambda} I_N \right)^{-2} y \right| = \left| y^T \left( \mathbb{E}[A'(-\lambda)] - \tilde{A}'(-\lambda) \right) y \right| \leq \frac{c_2 \|y\|_{K^{-1}}^2}{P},$$

which allows us to conclude.  $\square$

• **Bound on  $\text{Var} \left( \hat{f}_{\tilde{\lambda}}^{(RF)}(x) \right)$ .** We have shown all the bounds needed in order to prove the following proposition.



**Proposition C.15.** For any  $x \in \mathbb{R}^d$ , we have

$$\text{Var} \left( \hat{f}_\lambda^{(RF)}(x) \right) \leq \frac{c_3 K(x, x) \|y\|_{K^{-1}}^2}{P},$$

where  $c_3 > 0$  depends on  $\lambda, \gamma, T$ .

*Proof.* Recall that for any  $x \in \mathbb{R}^d$ ,

$$\begin{aligned} \text{Var}(\hat{f}_\lambda^{(RF)}(x)) &= \text{Var} \left( \mathbb{E} \left[ \hat{f}_\lambda^{(RF)}(x) \mid F \right] \right) + \mathbb{E} \left[ \text{Var} \left[ \hat{f}_\lambda^{(RF)}(x) \mid F \right] \right] \\ &= \text{Var} \left( K(x, X) K(X, X)^{-1} \hat{y} \right) + \frac{1}{P} \mathbb{E} \left[ \|\hat{\theta}\|^2 \right] \left[ K(x, x) - K(x, X) K(X, X)^{-1} K(X, x) \right]. \end{aligned}$$

From Proposition C.13,

$$\text{Var} \left( K(x, X) K(X, X)^{-1} \hat{y} \right) \leq \frac{c_1 K(x, x) \|y\|_{K^{-1}}^2}{P},$$

and from Proposition C.14, we have:

$$\mathbb{E} \left[ \|\hat{\theta}\|^2 \right] \leq \partial_\lambda \tilde{\lambda} y^T K \left( K + \tilde{\lambda} I_N \right)^{-2} y + \frac{c_2 \|y\|_{K^{-1}}^2}{P} \leq \partial_\lambda \tilde{\lambda} \|y\|_{K^{-1}}^2 + \frac{c_2 \|y\|_{K^{-1}}^2}{P} \leq \alpha \|y\|_{K^{-1}}^2,$$

where  $\alpha = \partial_\lambda \tilde{\lambda} + c_2$ . Using the fact that  $\tilde{K}(x, x) \leq K(x, x)$ , we get

$$\begin{aligned} \mathbb{E} \left[ \text{Var} \left[ \hat{f}(x) \mid F \right] \right] &= \frac{1}{P} \mathbb{E} \left[ \|\hat{\theta}\|^2 \right] \left[ K(x, x) - K(x, X) K(X, X)^{-1} K(X, x) \right] \\ &\leq \frac{\alpha \|y\|_{K^{-1}}^2 K(x, x)}{P}. \end{aligned}$$

This yields

$$\text{Var} \left( \hat{f}_\lambda^{(RF)}(x) \right) \leq \frac{c_3 \|y\|_{K^{-1}}^2 K(x, x)}{P},$$

where  $c_3 = \alpha + c_1$ . □

#### C.3.4. AVERAGE LOSS OF $\lambda$ -RF PREDICTOR AND LOSS OF $\tilde{\lambda}$ -KRR:

Putting the pieces together, we obtain the following bound on the difference  $\Delta_E = |\mathbb{E}[L(\hat{f}_{\lambda, \gamma}^{(RF)})] - L(\hat{f}_{\tilde{\lambda}}^{(K)})|$  between the expected RF loss and the KRR loss:

**Corollary C.16.** If  $\mathbb{E}_{\mathcal{D}}[K(x, x)] < \infty$ , we have

$$\Delta_E \leq \frac{C_1 \|y\|_{K^{-1}}}{P} \left( 2\sqrt{L(\hat{f}_{\tilde{\lambda}}^{(K)})} + C_2 \|y\|_{K^{-1}} \right),$$

where  $C_1$  and  $C_2$  depend on  $\lambda, \gamma, T$  and  $\mathbb{E}_{\mathcal{D}}[K(x, x)]$  only.

*Proof.* Using the bias/variance decomposition, Corollary C.9, and the bound on the variance of the predictor, we obtain

$$\begin{aligned} \left| \mathbb{E} \left[ L \left( \hat{f}_{\gamma, \lambda}^{(RF)} \right) \right] - L \left( \hat{f}_{\tilde{\lambda}}^{(K)} \right) \right| &\leq \left| L \left( \mathbb{E} \left[ \hat{f}_{\gamma, \lambda}^{(RF)} \right] \right) - L \left( \hat{f}_{\tilde{\lambda}}^{(K)} \right) \right| + \mathbb{E}_{\mathcal{D}} \left[ \text{Var} \left( \hat{f}(x) \right) \right] \\ &\leq \frac{C \|y\|_{K^{-1}}}{P} \left( 2\sqrt{L \left( \hat{f}_{\tilde{\lambda}}^{(K)} \right)} + \frac{C \|y\|_{K^{-1}}}{P} \right) + \frac{c_3 \|y\|_{K^{-1}}^2 \mathbb{E}_{\mathcal{D}} [K(x, x)]}{P} \\ &\leq \frac{C_1 \|y\|_{K^{-1}}}{P} \left( 2\sqrt{L \left( \hat{f}_{\tilde{\lambda}}^{(K)} \right)} + C_2 \|y\|_{K^{-1}} \right), \end{aligned}$$

where  $C_1$  and  $C_2$  depends on  $\lambda, \gamma, T$  and  $\mathbb{E}_{\mathcal{D}} [K(x, x)]$  only. □

C.3.5. DOUBLE DESCENT CURVE

Recall that for any  $\tilde{\lambda}$ , we denote  $M_{\tilde{\lambda}} = K(X, X)(K(X, X) + \tilde{\lambda}I_N)^{-2}$ . A direct consequence of Proposition C.14 is the following lower bound on the variance of the predictor.

**Corollary C.17.** *There exists  $c_4 > 0$  depending on  $\lambda, \gamma, T$  only such that  $\text{Var} \left( \hat{f}_{\tilde{\lambda}}^{(RF)}(x) \right)$  is bounded from below by*

$$\partial_{\lambda} \tilde{\lambda} \frac{y^T M_{\tilde{\lambda}} y}{P} \tilde{K}(x, x) - \frac{c_4 K(x, x) \|y\|_{K^{-1}}^2}{P^2}.$$

*Proof.* By the law of total cumulance,

$$\text{Var} \left( \hat{f}_{\tilde{\lambda}}^{(RF)}(x) \right) \geq \mathbb{E} \left[ \text{Var} \left[ \hat{f}_{\tilde{\lambda}}^{(RF)}(x) \mid F \right] \right] \geq \frac{1}{P} \mathbb{E} \left[ \|\hat{\theta}\|^2 \right] \tilde{K}(x, x).$$

From Proposition C.14,  $\mathbb{E}[\|\hat{\theta}\|^2] \geq \partial_{\lambda} \tilde{\lambda} y^T M_{\tilde{\lambda}} y - \frac{c_2 \|y\|_{K^{-1}}^2}{P}$ , hence

$$\text{Var} \left( \hat{f}_{\tilde{\lambda}}^{(RF)}(x) \right) \geq \partial_{\lambda} \tilde{\lambda} \frac{y^T M_{\tilde{\lambda}} y}{P} \tilde{K}(x, x) - \frac{c_4 \tilde{K}(x, x) \|y\|_{K^{-1}}^2}{P^2}.$$

The result follows from the fact that  $\tilde{K}(x, x) \leq K(x, x)$ . □

## References

- Au, B., C ebon, G., Dahlqvist, A., Gabriel, F., and Male, C. Large permutation invariant random matrices are asymptotically free over the diagonal, 2018. To appear in *Annals of Probability*.
- Bai, Z. and Wang, Z. Large sample covariance matrices without independence structures in columns. *Statistica Sinica*, 18: 425–442, 2008.
- Eaton, M. Multivariate statistics: A vector space approach. *Journal of the American Statistical Association*, 80, 01 2007. doi: 10.2307/20461449.
